# Supplementary material for: Dissecting the regulation rules of cancer-related miRNAs based on network analysis
Source: PubMed Central journal article supplement (PMC5046108; doi:10.1038/srep34172), 2016-10-03
Supplement: srep34172-s1.pdf [file srep34172-s1.pdf]

# **Dissecting the regulation rules of cancer-related miRNA based on network analysis**

Zhongyu Liu<sup>1</sup>, Yanzhi Guo<sup>2\*</sup>, Xuemei Pu<sup>2</sup>, Menglong Li<sup>2\*</sup>

<sup>1</sup>College of Life Science, Sichuan University, Chengdu, Sichuan 610064,  
PR China

<sup>2</sup>College of Chemistry, Sichuan University, Chengdu, Sichuan 610064,  
PR China

Corresponding authors marked with \*

Yanzhi Guo

Menglong Li

Tel: +86 28 85413330

Fax: +86 28 85412356

E-mail address:[yzguo@scu.edu.cn](mailto:yzguo@scu.edu.cn)

[liml@scu.edu.cn](mailto:liml@scu.edu.cn)

## Supplementary Tables:

Supplementary table S1 | Topological parameters of top 500 proteins in CePPIN

| Name    | Target | Degree | BC     | CCo    | CCe    | ASP    |
|---------|--------|--------|--------|--------|--------|--------|
| APP     | Y      | 1960   | 0.2206 | 0.0009 | 0.4502 | 2.2214 |
| HNF4A   | Y      | 1761   | 0.1858 | 0.0009 | 0.4376 | 2.2855 |
| ELAVL1  | Y      | 1732   | 0.1931 | 0.0018 | 0.4586 | 2.1808 |
| ESR1    | Y      | 799    | 0.0434 | 0.0117 | 0.4438 | 2.2532 |
| MYC     | Y      | 714    | 0.0441 | 0.0099 | 0.4317 | 2.3163 |
| FN1     | Y      | 689    | 0.0323 | 0.0088 | 0.4247 | 2.3547 |
| TP53    | Y      | 661    | 0.0446 | 0.0166 | 0.4604 | 2.1719 |
| SIRT7   | Y      | 655    | 0.035  | 0.0035 | 0.4179 | 2.3927 |
| CAND1   | Y      | 619    | 0.0269 | 0.0077 | 0.3993 | 2.5043 |
| YWHAZ   | Y      | 616    | 0.0329 | 0.012  | 0.4248 | 2.354  |
| CDK2    | Y      | 569    | 0.0253 | 0.0134 | 0.4269 | 2.3423 |
| HDAC1   | Y      | 541    | 0.0306 | 0.0184 | 0.4309 | 2.3206 |
| SP1     | Y      | 540    | 0.0387 | 0.0157 | 0.4361 | 2.2929 |
| VCP     | Y      | 440    | 0.0226 | 0.011  | 0.4133 | 2.4193 |
| UBC     | N      | 413    | 0.0485 | 0.0315 | 0.4899 | 2.0414 |
| CUL2    | Y      | 406    | 0.0182 | 0.0115 | 0.4126 | 2.4234 |
| BRCA1   | Y      | 404    | 0.0223 | 0.0221 | 0.4125 | 2.4244 |
| VHL     | Y      | 398    | 0.0213 | 0.0118 | 0.4269 | 2.3424 |
| EGFR    | Y      | 391    | 0.0185 | 0.0183 | 0.3966 | 2.5214 |
| SRC     | Y      | 338    | 0.0135 | 0.0226 | 0.392  | 2.5509 |
| CTNNB1  | Y      | 330    | 0.0211 | 0.0306 | 0.4603 | 2.1723 |
| SMAD3   | Y      | 330    | 0.0176 | 0.0274 | 0.44   | 2.273  |
| CSNK2A1 | Y      | 323    | 0.018  | 0.0168 | 0.4453 | 2.2455 |
| SIRT1   | Y      | 314    | 0.0171 | 0.0208 | 0.4277 | 2.3381 |
| SMAD2   | Y      | 313    | 0.0136 | 0.0186 | 0.4048 | 2.4705 |
| JUN     | Y      | 279    | 0.0148 | 0.0397 | 0.4451 | 2.2468 |
| ABL1    | Y      | 276    | 0.0152 | 0.0203 | 0.4038 | 2.4763 |
| AR      | Y      | 276    | 0.0124 | 0.0277 | 0.4086 | 2.4476 |
| CRK     | Y      | 257    | 0.0092 | 0.0179 | 0.3634 | 2.752  |
| CDKN1A  | Y      | 249    | 0.0133 | 0.0327 | 0.4451 | 2.2468 |
| AKT1    | Y      | 248    | 0.0094 | 0.0309 | 0.4115 | 2.43   |
| CREB1   | Y      | 245    | 0.0159 | 0.0178 | 0.4076 | 2.4535 |
| TRAF2   | Y      | 241    | 0.0109 | 0.0075 | 0.3556 | 2.8123 |
| NFKB1   | Y      | 240    | 0.0084 | 0.0242 | 0.3779 | 2.6463 |
| PIK3R1  | Y      | 235    | 0.0095 | 0.0286 | 0.3836 | 2.6071 |
| RB1     | Y      | 224    | 0.0057 | 0.0412 | 0.3892 | 2.5694 |
| STAT1   | Y      | 223    | 0.0102 | 0.0287 | 0.411  | 2.433  |
| STAT3   | Y      | 222    | 0.0088 | 0.0377 | 0.4083 | 2.4493 |
| FOS     | Y      | 214    | 0.0097 | 0.0346 | 0.4128 | 2.4225 |
| SRPK1   | Y      | 213    | 0.013  | 0.0139 | 0.4064 | 2.4605 |

|        |   |     |        |        |        |        |
|--------|---|-----|--------|--------|--------|--------|
| VIM    | Y | 206 | 0.0099 | 0.0181 | 0.403  | 2.4811 |
| HNRNPK | Y | 189 | 0.0049 | 0.0414 | 0.4083 | 2.4493 |
| HDAC4  | Y | 188 | 0.0111 | 0.0328 | 0.4395 | 2.2753 |
| MAPK1  | Y | 187 | 0.0065 | 0.0347 | 0.4047 | 2.4707 |
| NOTCH1 | Y | 181 | 0.0068 | 0.02   | 0.3928 | 2.5456 |
| PXN    | Y | 181 | 0.0047 | 0.0223 | 0.367  | 2.7248 |
| HDGF   | Y | 178 | 0.0029 | 0.0062 | 0.3526 | 2.8363 |
| SMAD4  | Y | 170 | 0.0074 | 0.0424 | 0.4201 | 2.3801 |
| IKBKB  | Y | 169 | 0.0035 | 0.039  | 0.3725 | 2.6844 |
| PLK1   | Y | 168 | 0.0087 | 0.0183 | 0.3952 | 2.5302 |
| PLCG1  | Y | 165 | 0.004  | 0.0216 | 0.3559 | 2.81   |
| E2F1   | Y | 161 | 0.0037 | 0.0544 | 0.3797 | 2.6334 |
| PPP2CA | Y | 159 | 0.0067 | 0.0289 | 0.3837 | 2.6061 |
| ERBB2  | Y | 157 | 0.005  | 0.0479 | 0.3962 | 2.5239 |
| HIF1A  | Y | 157 | 0.0054 | 0.0586 | 0.4138 | 2.4165 |
| CEBPB  | Y | 155 | 0.0071 | 0.0503 | 0.4209 | 2.3759 |
| YBX1   | Y | 154 | 0.0043 | 0.0399 | 0.4009 | 2.4946 |
| EZH2   | Y | 149 | 0.003  | 0.0465 | 0.3794 | 2.6358 |
| CDKN2A | Y | 148 | 0.0034 | 0.0419 | 0.3812 | 2.6232 |
| HGS    | Y | 148 | 0.0057 | 0.012  | 0.3781 | 2.6451 |
| RAC1   | Y | 148 | 0.0054 | 0.0133 | 0.3592 | 2.7843 |
| YY1    | Y | 147 | 0.0058 | 0.0412 | 0.4162 | 2.4024 |
| ILK    | Y | 146 | 0.0037 | 0.0109 | 0.3596 | 2.7808 |
| MAP3K1 | Y | 146 | 0.0022 | 0.0272 | 0.3663 | 2.7303 |
| CDC42  | Y | 144 | 0.0054 | 0.0152 | 0.3759 | 2.6603 |
| NFKBIA | Y | 142 | 0.0025 | 0.0395 | 0.3737 | 2.6761 |
| MLH1   | Y | 140 | 0.0065 | 0.0166 | 0.3766 | 2.6557 |
| APC    | Y | 136 | 0.0046 | 0.0118 | 0.3609 | 2.7705 |
| ETS1   | Y | 133 | 0.0065 | 0.0334 | 0.4097 | 2.4405 |
| RAF1   | Y | 133 | 0.0039 | 0.041  | 0.3728 | 2.6823 |
| SRSF1  | Y | 131 | 0.0047 | 0.0571 | 0.4323 | 2.3132 |
| CDH1   | Y | 130 | 0.0028 | 0.0304 | 0.3648 | 2.7412 |
| CDK4   | Y | 130 | 0.0033 | 0.0425 | 0.3909 | 2.5582 |
| TP63   | Y | 129 | 0.0035 | 0.0203 | 0.3624 | 2.7591 |
| MAPK3  | Y | 127 | 0.0035 | 0.0292 | 0.3898 | 2.5656 |
| GJA1   | Y | 126 | 0.0029 | 0.0156 | 0.3611 | 2.7689 |
| VDR    | Y | 124 | 0.0035 | 0.0514 | 0.3948 | 2.533  |
| PPARG  | Y | 123 | 0.0046 | 0.0399 | 0.3881 | 2.5769 |
| ATM    | Y | 117 | 0.0031 | 0.0455 | 0.3926 | 2.547  |
| MAP3K7 | Y | 117 | 0.0049 | 0.0224 | 0.3725 | 2.6849 |
| CCND1  | Y | 116 | 0.0022 | 0.0871 | 0.4012 | 2.4926 |
| PTK2   | Y | 116 | 0.0055 | 0.0708 | 0.4267 | 2.3436 |
| BCL2   | Y | 114 | 0.0025 | 0.0483 | 0.3674 | 2.7217 |
| MYH9   | Y | 114 | 0.0034 | 0.037  | 0.3955 | 2.5286 |

|          |   |     |        |        |        |        |
|----------|---|-----|--------|--------|--------|--------|
| PRKCA    | Y | 113 | 0.0047 | 0.0267 | 0.3842 | 2.6027 |
| CDK6     | Y | 109 | 0.0033 | 0.0423 | 0.3833 | 2.6088 |
| NCOA3    | Y | 108 | 0.0029 | 0.0827 | 0.4152 | 2.4083 |
| RHOA     | Y | 108 | 0.0024 | 0.0116 | 0.3475 | 2.878  |
| TLE1     | Y | 108 | 0.0038 | 0.0216 | 0.3602 | 2.776  |
| EZR      | Y | 107 | 0.0049 | 0.0332 | 0.3928 | 2.5455 |
| EP300    | N | 103 | 0.0023 | 0.1411 | 0.4089 | 2.4457 |
| PTP4A3   | Y | 102 | 0.0031 | 0.0076 | 0.3627 | 2.7568 |
| ESR2     | Y | 101 | 0.0011 | 0.0448 | 0.3636 | 2.7506 |
| KDM1A    | Y | 100 | 0.0012 | 0.0586 | 0.3706 | 2.6984 |
| CASP3    | Y | 99  | 0.0041 | 0.0418 | 0.4052 | 2.4677 |
| MTOR     | Y | 99  | 0.0027 | 0.046  | 0.377  | 2.6524 |
| NCOR2    | Y | 99  | 0.0019 | 0.0932 | 0.3896 | 2.5668 |
| CCNB1    | Y | 98  | 0.0021 | 0.0614 | 0.3783 | 2.6437 |
| HSP90AA1 | N | 97  | 0.0037 | 0.0868 | 0.4281 | 2.3361 |
| MSH2     | Y | 96  | 0.0014 | 0.0612 | 0.3766 | 2.6552 |
| DNMT1    | Y | 94  | 0.0012 | 0.0917 | 0.3781 | 2.6449 |
| MED1     | Y | 93  | 0.0025 | 0.0697 | 0.4028 | 2.4828 |
| IQGAP1   | Y | 92  | 0.0019 | 0.0628 | 0.3821 | 2.6171 |
| IRAK1    | Y | 92  | 0.0018 | 0.0306 | 0.3559 | 2.8098 |
| JAK2     | Y | 92  | 0.0017 | 0.075  | 0.3611 | 2.7695 |
| PIK3R2   | Y | 92  | 0.0021 | 0.0839 | 0.3863 | 2.5886 |
| PTEN     | Y | 92  | 0.0037 | 0.0368 | 0.3837 | 2.6064 |
| BCL2L1   | Y | 91  | 0.0035 | 0.0508 | 0.3886 | 2.5736 |
| PHB      | Y | 91  | 0.0032 | 0.0518 | 0.3909 | 2.5579 |
| ITGB1    | Y | 88  | 0.0036 | 0.0374 | 0.3775 | 2.6487 |
| SMAD7    | Y | 88  | 0.0017 | 0.0721 | 0.3642 | 2.7459 |
| CDKN1B   | Y | 87  | 0.0019 | 0.0922 | 0.4114 | 2.4309 |
| YAP1     | Y | 86  | 0.0027 | 0.0451 | 0.3805 | 2.6282 |
| CTBP1    | Y | 85  | 0.002  | 0.0667 | 0.3835 | 2.6077 |
| PAK1     | Y | 84  | 0.0032 | 0.0522 | 0.3887 | 2.5727 |
| TFAP2A   | Y | 82  | 0.003  | 0.0623 | 0.411  | 2.433  |
| EGR1     | N | 81  | 0.0018 | 0.0966 | 0.3893 | 2.569  |
| HMGA1    | Y | 81  | 0.0009 | 0.0546 | 0.3675 | 2.721  |
| SMARCA5  | Y | 80  | 0.0014 | 0.0604 | 0.3873 | 2.5823 |
| SPP1     | Y | 80  | 0.003  | 0.0028 | 0.34   | 2.9413 |
| CCNE1    | Y | 78  | 0.0008 | 0.0839 | 0.3784 | 2.6426 |
| FBXW7    | Y | 78  | 0.0013 | 0.0336 | 0.3523 | 2.8385 |
| CCNA2    | Y | 77  | 0.0005 | 0.1077 | 0.3718 | 2.6897 |
| SEC23A   | Y | 76  | 0.003  | 0.0319 | 0.3811 | 2.6242 |
| DNMT3B   | Y | 75  | 0.0013 | 0.0818 | 0.3662 | 2.7309 |
| SMARCD1  | Y | 75  | 0.0017 | 0.0404 | 0.3585 | 2.7893 |
| SRSF2    | Y | 75  | 0.0016 | 0.0746 | 0.3886 | 2.5733 |
| CLU      | Y | 74  | 0.0029 | 0.0255 | 0.3762 | 2.6582 |

|          |   |    |        |        |        |        |
|----------|---|----|--------|--------|--------|--------|
| FOXO3    | Y | 74 | 0.0014 | 0.107  | 0.3967 | 2.521  |
| KEAP1    | Y | 74 | 0.0021 | 0.0141 | 0.3468 | 2.8837 |
| SUMO2    | N | 74 | 0.0016 | 0.0955 | 0.407  | 2.4567 |
| ERBB3    | Y | 72 | 0.0014 | 0.1002 | 0.3565 | 2.805  |
| SUMO1    | N | 72 | 0.0023 | 0.1307 | 0.4314 | 2.3179 |
| SUZ12    | Y | 72 | 0.0007 | 0.1045 | 0.3799 | 2.6326 |
| HDAC2    | N | 71 | 0.0013 | 0.1658 | 0.4144 | 2.4131 |
| ARHGDI2  | Y | 69 | 0.0016 | 0.0426 | 0.3614 | 2.7673 |
| CREBBP   | N | 69 | 0.0017 | 0.1897 | 0.4276 | 2.3384 |
| HSP90AB1 | N | 69 | 0.0018 | 0.098  | 0.3983 | 2.5104 |
| RBL2     | Y | 69 | 0.0023 | 0.0921 | 0.398  | 2.5124 |
| SOCS3    | Y | 69 | 0.0028 | 0.0533 | 0.3959 | 2.5261 |
| RELA     | N | 67 | 0.0014 | 0.1452 | 0.3908 | 2.5591 |
| SH3GL2   | Y | 66 | 0.0031 | 0.0121 | 0.365  | 2.7395 |
| TGFBR1   | Y | 66 | 0.0014 | 0.0895 | 0.3811 | 2.6241 |
| CDH2     | Y | 65 | 0.0016 | 0.0135 | 0.347  | 2.8818 |
| GRB2     | N | 65 | 0.0022 | 0.1337 | 0.4149 | 2.4102 |
| BMI1     | Y | 64 | 0.0018 | 0.0585 | 0.3897 | 2.5664 |
| RAB5A    | Y | 64 | 0.0023 | 0.0149 | 0.3617 | 2.7651 |
| SOCS1    | Y | 64 | 0.0013 | 0.0779 | 0.3636 | 2.7505 |
| DAB2     | Y | 63 | 0.0014 | 0.0497 | 0.3802 | 2.6304 |
| GNAI2    | Y | 63 | 0.0031 | 0.0061 | 0.3437 | 2.9094 |
| SOX2     | Y | 63 | 0.0011 | 0.0492 | 0.3456 | 2.8939 |
| APOE     | Y | 62 | 0.0037 | 0.0296 | 0.3967 | 2.521  |
| EED      | Y | 62 | 0.0013 | 0.0788 | 0.37   | 2.7027 |
| PTPN1    | Y | 62 | 0.0009 | 0.0788 | 0.365  | 2.7395 |
| SRF      | Y | 62 | 0.0005 | 0.0471 | 0.351  | 2.8487 |
| CDC25A   | Y | 61 | 0.0017 | 0.0754 | 0.4043 | 2.4732 |
| MSH6     | Y | 61 | 0.0005 | 0.0962 | 0.3679 | 2.7178 |
| NR0B2    | Y | 60 | 0.001  | 0.0847 | 0.3895 | 2.5675 |
| RAP1A    | Y | 60 | 0.0022 | 0.0305 | 0.3783 | 2.6435 |
| LAMTOR5  | N | 59 | 0.0019 | 0.0152 | 0.3632 | 2.7532 |
| RASA1    | Y | 59 | 0.0015 | 0.083  | 0.3933 | 2.5427 |
| CXCR4    | Y | 58 | 0.0008 | 0.0448 | 0.3584 | 2.7901 |
| IGF1R    | Y | 58 | 0.0017 | 0.127  | 0.3892 | 2.5693 |
| PRDX2    | Y | 58 | 0.0024 | 0.0526 | 0.3863 | 2.5884 |
| TGFBR2   | Y | 58 | 0.0013 | 0.0901 | 0.3826 | 2.6137 |
| HDAC3    | N | 57 | 0.0011 | 0.1848 | 0.407  | 2.4569 |
| MTA1     | Y | 57 | 0.001  | 0.1003 | 0.3773 | 2.6508 |
| RUNX2    | Y | 57 | 0.001  | 0.1103 | 0.3644 | 2.7444 |
| TPM1     | Y | 57 | 0.0018 | 0.0326 | 0.3769 | 2.6532 |
| CD44     | Y | 56 | 0.0012 | 0.0857 | 0.3837 | 2.6065 |
| IL8      | Y | 56 | 0.0015 | 0.0857 | 0.3695 | 2.7064 |
| IRS1     | Y | 56 | 0.0008 | 0.1584 | 0.3852 | 2.5961 |

|          |   |    |        |        |        |        |
|----------|---|----|--------|--------|--------|--------|
| RPS6KB1  | Y | 56 | 0.0009 | 0.0734 | 0.3927 | 2.5464 |
| YES1     | Y | 56 | 0.0008 | 0.0578 | 0.3793 | 2.6365 |
| CUL3     | N | 55 | 0.0014 | 0.0747 | 0.4148 | 2.4108 |
| MCM5     | Y | 55 | 0.001  | 0.0505 | 0.3827 | 2.6132 |
| VASP     | Y | 55 | 0.0014 | 0.0195 | 0.3487 | 2.8674 |
| CASP7    | Y | 54 | 0.001  | 0.0412 | 0.3563 | 2.8066 |
| COPS5    | N | 54 | 0.0021 | 0.1495 | 0.4408 | 2.2684 |
| PCMT1    | Y | 54 | 0.0011 | 0.0321 | 0.3779 | 2.6465 |
| PIK3CA   | Y | 54 | 0.0012 | 0.0783 | 0.3615 | 2.7665 |
| AKT2     | Y | 53 | 0.0016 | 0.037  | 0.3761 | 2.6588 |
| CFLAR    | Y | 53 | 0.0008 | 0.0537 | 0.3599 | 2.7789 |
| SRSF9    | Y | 53 | 0.001  | 0.0842 | 0.3925 | 2.548  |
| TERT     | Y | 53 | 0.0008 | 0.1277 | 0.3749 | 2.6673 |
| UHRF2    | Y | 53 | 0.0005 | 0.111  | 0.3625 | 2.7586 |
| CDK19    | Y | 52 | 0.0004 | 0.0249 | 0.33   | 3.0303 |
| MDM2     | N | 52 | 0.0012 | 0.1456 | 0.4189 | 2.3871 |
| PPARA    | Y | 52 | 0.0018 | 0.0483 | 0.3615 | 2.7666 |
| PPP2R2A  | Y | 52 | 0.0009 | 0.0483 | 0.3696 | 2.7057 |
| RPS6KA5  | Y | 52 | 0.0018 | 0.0528 | 0.3991 | 2.5057 |
| ARNT     | Y | 51 | 0.0013 | 0.0722 | 0.3783 | 2.6435 |
| FSCN1    | Y | 51 | 0.0007 | 0.0384 | 0.3621 | 2.7618 |
| GABPA    | Y | 51 | 0.0023 | 0.0612 | 0.3986 | 2.5089 |
| LARP1    | Y | 51 | 0.0008 | 0.0855 | 0.3795 | 2.6348 |
| MET      | Y | 51 | 0.0012 | 0.0714 | 0.3559 | 2.8097 |
| PPARGC1A | Y | 51 | 0.0004 | 0.1114 | 0.3791 | 2.6381 |
| PTMA     | Y | 51 | 0.0011 | 0.051  | 0.3723 | 2.6859 |
| TCF4     | Y | 51 | 0.0009 | 0.0588 | 0.3498 | 2.8591 |
| TGFB1    | Y | 51 | 0.0029 | 0.0792 | 0.3993 | 2.5041 |
| ATF2     | N | 50 | 0.001  | 0.1682 | 0.4181 | 2.3916 |
| GSK3B    | N | 50 | 0.0017 | 0.1453 | 0.4369 | 2.2888 |
| ING1     | Y | 50 | 0.0006 | 0.1102 | 0.3808 | 2.6259 |
| SHMT2    | Y | 50 | 0.0011 | 0.0482 | 0.3759 | 2.6604 |
| SPRY2    | Y | 50 | 0.0026 | 0.0343 | 0.3717 | 2.6903 |
| YWHAQ    | N | 50 | 0.0008 | 0.1461 | 0.4028 | 2.4824 |
| AHR      | Y | 49 | 0.0009 | 0.0935 | 0.3627 | 2.7574 |
| IGF2BP1  | Y | 49 | 0.0006 | 0.0604 | 0.3648 | 2.7413 |
| KIT      | Y | 49 | 0.0006 | 0.0918 | 0.3553 | 2.8143 |
| PRKCE    | Y | 49 | 0.0013 | 0.0723 | 0.3915 | 2.5545 |
| FOSL1    | Y | 48 | 0.0004 | 0.0984 | 0.3593 | 2.7829 |
| MAPRE1   | Y | 48 | 0.0011 | 0.047  | 0.3771 | 2.6518 |
| MDM4     | Y | 48 | 0.0007 | 0.125  | 0.3836 | 2.6068 |
| PRKACB   | Y | 48 | 0.001  | 0.0115 | 0.3434 | 2.9122 |
| SKI      | Y | 48 | 0.0008 | 0.1516 | 0.3865 | 2.5875 |
| KIAA0101 | N | 47 | 0.0005 | 0.1018 | 0.3888 | 2.5717 |

|          |   |    |        |        |        |        |
|----------|---|----|--------|--------|--------|--------|
| NME1     | Y | 46 | 0.0015 | 0.0203 | 0.37   | 2.7025 |
| BCL3     | Y | 45 | 0.0003 | 0.1404 | 0.3611 | 2.7689 |
| BRAF     | Y | 45 | 0.0003 | 0.1    | 0.3515 | 2.845  |
| MECP2    | Y | 45 | 0.0009 | 0.0747 | 0.372  | 2.6881 |
| PPP3CA   | Y | 45 | 0.0011 | 0.0162 | 0.3451 | 2.8981 |
| UBE2I    | N | 45 | 0.0008 | 0.1737 | 0.3962 | 2.5243 |
| USF2     | Y | 45 | 0.0018 | 0.0343 | 0.3864 | 2.5878 |
| BIRC5    | Y | 44 | 0.0005 | 0.0793 | 0.3749 | 2.6673 |
| CUL1     | N | 44 | 0.0005 | 0.1416 | 0.3933 | 2.5427 |
| ESRRA    | Y | 44 | 0.0007 | 0.0391 | 0.351  | 2.8491 |
| GIT2     | Y | 44 | 0.0009 | 0.0106 | 0.3351 | 2.9842 |
| CCND3    | Y | 43 | 0.0009 | 0.0831 | 0.3791 | 2.6379 |
| FTH1     | Y | 43 | 0.0009 | 0.0066 | 0.3402 | 2.9396 |
| HES1     | Y | 43 | 0.001  | 0.0698 | 0.3714 | 2.6923 |
| HSPA4    | N | 43 | 0.001  | 0.1528 | 0.4109 | 2.4334 |
| MCL1     | Y | 43 | 0.0002 | 0.0975 | 0.3498 | 2.8588 |
| PIK3R3   | Y | 43 | 0.001  | 0.0875 | 0.3648 | 2.7414 |
| SMARCA4  | N | 43 | 0.0006 | 0.2071 | 0.3901 | 2.5631 |
| CYLD     | Y | 42 | 0.0014 | 0.0441 | 0.3641 | 2.7463 |
| DNMT3A   | Y | 42 | 0.0006 | 0.1161 | 0.3537 | 2.8272 |
| FOXO1    | Y | 42 | 0.0006 | 0.1324 | 0.3854 | 2.5947 |
| HSPA8    | N | 42 | 0.001  | 0.1905 | 0.4139 | 2.4159 |
| PIN1     | N | 42 | 0.0009 | 0.1905 | 0.4175 | 2.3952 |
| ATG7     | Y | 41 | 0.0012 | 0.0695 | 0.3671 | 2.7244 |
| HSPA1B   | N | 41 | 0.0009 | 0.1488 | 0.4085 | 2.4482 |
| BCL2L11  | Y | 40 | 0.001  | 0.0769 | 0.3719 | 2.689  |
| LEF1     | Y | 40 | 0.0004 | 0.1359 | 0.3568 | 2.8029 |
| MITF     | Y | 40 | 0.0021 | 0.0564 | 0.3927 | 2.5462 |
| PGRMC1   | Y | 40 | 0.0007 | 0.0077 | 0.3421 | 2.9235 |
| PML      | N | 40 | 0.0003 | 0.2295 | 0.3817 | 2.6201 |
| BAG3     | Y | 39 | 0.0007 | 0.0243 | 0.3415 | 2.9279 |
| FGFR1    | Y | 39 | 0.0012 | 0.0864 | 0.3504 | 2.8539 |
| MAPK8    | N | 39 | 0.0008 | 0.1565 | 0.3977 | 2.5142 |
| MIF      | Y | 39 | 0.0005 | 0.0499 | 0.3591 | 2.785  |
| PIM1     | Y | 39 | 0.0006 | 0.0918 | 0.3932 | 2.5431 |
| PTGS2    | Y | 39 | 0.0004 | 0.1363 | 0.3776 | 2.6482 |
| VEGFA    | Y | 39 | 0.0011 | 0.1484 | 0.3815 | 2.6209 |
| YWHAG    | N | 39 | 0.0008 | 0.1552 | 0.4106 | 2.4354 |
| COPS8    | Y | 38 | 0.0004 | 0.0797 | 0.3698 | 2.7044 |
| GAB2     | Y | 38 | 0.0002 | 0.1607 | 0.3482 | 2.8723 |
| HIST1H4E | N | 38 | 0.0009 | 0.1821 | 0.4198 | 2.382  |
| IKBKG    | N | 38 | 0.0005 | 0.1209 | 0.3739 | 2.6748 |
| MAP3K11  | Y | 38 | 0.0009 | 0.0782 | 0.3704 | 2.6999 |
| TAGLN2   | Y | 38 | 0.0013 | 0.0583 | 0.3977 | 2.5146 |

|        |   |    |        |        |        |        |
|--------|---|----|--------|--------|--------|--------|
| TRAF6  | N | 38 | 0.0012 | 0.0868 | 0.4066 | 2.4594 |
| ACTB   | N | 37 | 0.001  | 0.2057 | 0.4226 | 2.3662 |
| GSK3A  | Y | 37 | 0.0012 | 0.0691 | 0.3754 | 2.6637 |
| IRS2   | Y | 37 | 0.0004 | 0.1922 | 0.3853 | 2.5956 |
| THBS1  | Y | 37 | 0.001  | 0.0586 | 0.3684 | 2.7143 |
| YWHAE  | N | 37 | 0.0003 | 0.1471 | 0.3767 | 2.6545 |
| COL1A1 | Y | 36 | 0.0014 | 0.0984 | 0.3787 | 2.6403 |
| FGFR3  | Y | 36 | 0.0013 | 0.0016 | 0.331  | 3.0208 |
| GSTP1  | Y | 36 | 0.0004 | 0.0667 | 0.3633 | 2.7523 |
| HSPA5  | N | 36 | 0.0008 | 0.2    | 0.4052 | 2.4679 |
| PLAUR  | Y | 36 | 0.0007 | 0.0206 | 0.3542 | 2.823  |
| RABEP1 | Y | 36 | 0.0007 | 0.027  | 0.3416 | 2.9273 |
| STUB1  | N | 36 | 0.0008 | 0.1841 | 0.4013 | 2.4921 |
| YWHAB  | N | 36 | 0.0009 | 0.1683 | 0.4295 | 2.3284 |
| CHUK   | N | 35 | 0.0006 | 0.2134 | 0.3939 | 2.539  |
| MAPK7  | Y | 35 | 0.0011 | 0.0387 | 0.3802 | 2.6305 |
| MYO6   | Y | 35 | 0.0005 | 0.0403 | 0.3549 | 2.8175 |
| PRKDC  | N | 35 | 0.0006 | 0.2437 | 0.4054 | 2.4666 |
| RDX    | Y | 35 | 0.001  | 0.0723 | 0.3698 | 2.7044 |
| RHOB   | Y | 35 | 0.0008 | 0.0235 | 0.3588 | 2.7873 |
| RUNX3  | Y | 35 | 0.0004 | 0.1109 | 0.3529 | 2.8338 |
| SP3    | N | 35 | 0.0003 | 0.1697 | 0.3696 | 2.7059 |
| BUB1   | Y | 34 | 0.0009 | 0.0481 | 0.3538 | 2.8262 |
| ITGA4  | N | 34 | 0.0002 | 0.1105 | 0.3573 | 2.7985 |
| KAT2B  | N | 34 | 0.0002 | 0.2282 | 0.3723 | 2.6862 |
| KRAS   | Y | 34 | 0.0017 | 0.0481 | 0.3898 | 2.5656 |
| PARP1  | N | 34 | 0.0005 | 0.2389 | 0.4026 | 2.4841 |
| SNX1   | Y | 34 | 0.0016 | 0.0784 | 0.3683 | 2.7155 |
| CALM3  | N | 33 | 0.0005 | 0.1439 | 0.3959 | 2.5257 |
| CAV1   | N | 33 | 0.001  | 0.1326 | 0.4136 | 2.4176 |
| CBL    | N | 33 | 0.0003 | 0.2045 | 0.358  | 2.7933 |
| CLINT1 | Y | 33 | 0.0007 | 0.0208 | 0.36   | 2.7781 |
| DAPK1  | Y | 33 | 0.0003 | 0.0265 | 0.3468 | 2.8835 |
| MMP2   | Y | 33 | 0.0009 | 0.0966 | 0.3602 | 2.7759 |
| NEDD9  | Y | 33 | 0.0005 | 0.1212 | 0.3732 | 2.6795 |
| NPM1   | N | 33 | 0.0008 | 0.233  | 0.4069 | 2.4573 |
| PEBP1  | Y | 33 | 0.0006 | 0.0587 | 0.3541 | 2.8243 |
| RAP1B  | Y | 33 | 0.0006 | 0.0341 | 0.3742 | 2.6724 |
| SNAI1  | Y | 33 | 0.0008 | 0.1212 | 0.3529 | 2.8337 |
| XRCC6  | N | 33 | 0.0004 | 0.1799 | 0.3855 | 2.5942 |
| BTRC   | N | 32 | 0.0006 | 0.1694 | 0.4031 | 2.481  |
| E2F3   | Y | 32 | 0.0003 | 0.0605 | 0.3629 | 2.7554 |
| E2F6   | Y | 32 | 0.0006 | 0.0665 | 0.3643 | 2.7452 |
| FOXM1  | Y | 32 | 0.0002 | 0.1754 | 0.3617 | 2.7649 |



|          |   |    |        |        |        |        |
|----------|---|----|--------|--------|--------|--------|
| KLF5     | Y | 32 | 0.0003 | 0.2339 | 0.3864 | 2.5879 |
| NEDD8    | N | 32 | 0.0006 | 0.1734 | 0.4086 | 2.4474 |
| SHC1     | N | 32 | 0.0004 | 0.2661 | 0.3833 | 2.609  |
| CDK1     | N | 31 | 0.0003 | 0.2495 | 0.3913 | 2.5559 |
| CEBPA    | N | 31 | 0.0006 | 0.2946 | 0.406  | 2.463  |
| EPB41L3  | Y | 31 | 0.0011 | 0.0796 | 0.3755 | 2.6634 |
| KAT5     | N | 31 | 0.0005 | 0.1935 | 0.3953 | 2.5297 |
| MUC1     | Y | 31 | 0.0002 | 0.228  | 0.3659 | 2.7331 |
| PCNA     | N | 31 | 0.0002 | 0.1849 | 0.3697 | 2.7046 |
| PLAU     | Y | 31 | 0.0005 | 0.0796 | 0.3605 | 2.7735 |
| PNP      | Y | 31 | 0.0007 | 0.0301 | 0.3552 | 2.8154 |
| SERPINE1 | Y | 31 | 0.0005 | 0.1097 | 0.3694 | 2.707  |
| SKP2     | N | 31 | 0.0005 | 0.2796 | 0.4088 | 2.446  |
| STMN1    | Y | 31 | 0.0005 | 0.0753 | 0.3572 | 2.7994 |
| ASAP1    | Y | 30 | 0.0011 | 0.1586 | 0.3677 | 2.72   |
| EPHA2    | Y | 30 | 0.0017 | 0.1126 | 0.4082 | 2.4499 |
| FGF2     | Y | 30 | 0.0007 | 0.0483 | 0.349  | 2.8651 |
| FYN      | N | 30 | 0.0001 | 0.1563 | 0.3533 | 2.8304 |
| GNB2L1   | N | 30 | 0.0005 | 0.1816 | 0.3818 | 2.619  |
| ITGA5    | Y | 30 | 0.0008 | 0.0575 | 0.3483 | 2.8708 |
| KLF4     | Y | 30 | 0.0005 | 0.1839 | 0.3818 | 2.619  |
| PDCD4    | Y | 30 | 0.0007 | 0.0759 | 0.3867 | 2.5857 |
| PRAME    | Y | 30 | 0.0001 | 0.0437 | 0.3426 | 2.9186 |
| PTPN11   | N | 30 | 0.0006 | 0.2943 | 0.3951 | 2.5309 |
| SIN3A    | N | 30 | 0.0001 | 0.2046 | 0.365  | 2.7398 |
| ABCC1    | Y | 29 | 0.0012 | 0      | 0.3368 | 2.969  |
| ACVR1B   | Y | 29 | 0.0013 | 0.0961 | 0.3637 | 2.7498 |
| BAK1     | Y | 29 | 0.0003 | 0.0788 | 0.3455 | 2.8942 |
| BMPR2    | Y | 29 | 0.0013 | 0.0419 | 0.3417 | 2.9267 |
| CBFB     | Y | 29 | 0.001  | 0.0542 | 0.3899 | 2.5646 |
| CUL4B    | N | 29 | 0.0006 | 0.1453 | 0.4005 | 2.497  |
| DICER1   | Y | 29 | 0.0009 | 0.0099 | 0.3448 | 2.9    |
| LATS2    | Y | 29 | 0.0004 | 0.0517 | 0.3664 | 2.7296 |
| MAPK14   | N | 29 | 0.0002 | 0.1478 | 0.3652 | 2.7385 |
| RBBP4    | N | 29 | 0.0005 | 0.2857 | 0.4119 | 2.4278 |
| RXRA     | N | 29 | 0.0002 | 0.3202 | 0.3769 | 2.653  |
| CASP8    | N | 28 | 0.0006 | 0.164  | 0.3829 | 2.6116 |
| GNA13    | Y | 28 | 0.0009 | 0.0344 | 0.3597 | 2.7803 |
| HDAC5    | N | 28 | 0.0002 | 0.2222 | 0.3739 | 2.6746 |
| PPP1CA   | N | 28 | 0.0005 | 0.1958 | 0.3943 | 2.5364 |
| RBX1     | N | 28 | 0.0005 | 0.1667 | 0.4017 | 2.4892 |
| SATB1    | Y | 28 | 0.0001 | 0.1058 | 0.3486 | 2.8684 |
| SMURF1   | N | 28 | 0.0004 | 0.2011 | 0.3891 | 2.5698 |
| VCAM1    | N | 28 | 0.0003 | 0.0899 | 0.3729 | 2.6818 |

|         |   |    |        |        |        |        |
|---------|---|----|--------|--------|--------|--------|
| XPO1    | N | 28 | 0.0007 | 0.1799 | 0.4115 | 2.4304 |
| AXL     | Y | 27 | 0.0006 | 0.1368 | 0.3644 | 2.7441 |
| CBX7    | Y | 27 | 0.0004 | 0.0484 | 0.3293 | 3.0369 |
| HBP1    | Y | 27 | 0.0009 | 0.0712 | 0.3721 | 2.6877 |
| ID1     | Y | 27 | 0.0004 | 0.0627 | 0.3448 | 2.9003 |
| MMP9    | Y | 27 | 0.0004 | 0.1197 | 0.3425 | 2.9193 |
| MYCN    | Y | 27 | 0.0001 | 0.0798 | 0.3514 | 2.8458 |
| NCK1    | N | 27 | 0.0005 | 0.2137 | 0.3706 | 2.698  |
| NCOR1   | N | 27 | 0.0003 | 0.3077 | 0.3881 | 2.5768 |
| NR3C1   | N | 27 | 0.0004 | 0.2051 | 0.3836 | 2.6069 |
| PRKCD   | N | 27 | 0.0006 | 0.2279 | 0.4079 | 2.4513 |
| RAP2A   | Y | 27 | 0.0011 | 0.0199 | 0.3585 | 2.7891 |
| TUBB    | N | 27 | 0.0009 | 0.2279 | 0.4184 | 2.3902 |
| TWIST1  | Y | 27 | 0.0002 | 0.1481 | 0.3529 | 2.834  |
| ARHGEF2 | Y | 26 | 0.0006 | 0.1662 | 0.3801 | 2.6311 |
| CEBPD   | N | 26 | 0.0001 | 0.2462 | 0.3594 | 2.7825 |
| COL1A2  | Y | 26 | 0.0002 | 0.1077 | 0.3495 | 2.861  |
| DDB1    | N | 26 | 0.0002 | 0.1908 | 0.3752 | 2.6653 |
| EEF1A1  | N | 26 | 0.0004 | 0.1631 | 0.372  | 2.6882 |
| FLNA    | N | 26 | 0.0008 | 0.2031 | 0.4005 | 2.4968 |
| GAPDH   | N | 26 | 0.0004 | 0.1969 | 0.3969 | 2.5197 |
| HSPD1   | N | 26 | 0.0005 | 0.2277 | 0.4057 | 2.4649 |
| ING4    | Y | 26 | 0.0006 | 0.0615 | 0.3679 | 2.718  |
| NEDD4   | N | 26 | 0.0002 | 0.1046 | 0.3557 | 2.8116 |
| PDGFRA  | Y | 26 | 0.0003 | 0.1077 | 0.3465 | 2.886  |
| PPP6C   | Y | 26 | 0.0007 | 0.08   | 0.3908 | 2.5587 |
| SMAD1   | N | 26 | 0.0003 | 0.1908 | 0.3756 | 2.6627 |
| SMARCC1 | N | 26 | 0.0003 | 0.2954 | 0.4007 | 2.4957 |
| ARRB2   | N | 25 | 0.0002 | 0.14   | 0.3581 | 2.7921 |
| CDC37   | N | 25 | 0.0004 | 0.14   | 0.3771 | 2.6515 |
| CSNK2B  | N | 25 | 0.0002 | 0.21   | 0.3672 | 2.7236 |
| CUX1    | Y | 25 | 0.0005 | 0.0333 | 0.34   | 2.9413 |
| ESRRG   | Y | 25 | 0.0006 | 0.0967 | 0.3735 | 2.6774 |
| FHL2    | N | 25 | 0.0004 | 0.21   | 0.3903 | 2.5621 |
| FLT1    | Y | 25 | 0.0003 | 0.21   | 0.3556 | 2.8124 |
| HSPA9   | N | 25 | 0.0006 | 0.2033 | 0.4053 | 2.4674 |
| IKBKE   | N | 25 | 0.0001 | 0.0367 | 0.3414 | 2.9293 |
| MKI67   | Y | 25 | 0.0003 | 0.0767 | 0.3597 | 2.7802 |
| PPP1CC  | N | 25 | 0.0005 | 0.27   | 0.4087 | 2.4468 |
| PRK CZ  | N | 25 | 0.0001 | 0.17   | 0.3665 | 2.7284 |
| RAB14   | Y | 25 | 0.0005 | 0.06   | 0.3696 | 2.706  |
| ARRB1   | N | 24 | 0.0001 | 0.1341 | 0.3577 | 2.7959 |
| FLI1    | Y | 24 | 0.0003 | 0.0833 | 0.346  | 2.8901 |
| GMNN    | Y | 24 | 0.0004 | 0.1196 | 0.3545 | 2.821  |

|         |   |    |        |        |        |        |
|---------|---|----|--------|--------|--------|--------|
| MAP3K2  | Y | 24 | 0      | 0      | 0.3368 | 2.9693 |
| NCL     | N | 24 | 0.0002 | 0.3225 | 0.3984 | 2.51   |
| NF1     | Y | 24 | 0.0003 | 0.1014 | 0.377  | 2.6522 |
| NTRK2   | Y | 24 | 0.0004 | 0.0362 | 0.3423 | 2.9218 |
| PBX2    | Y | 24 | 0.0012 | 0.0181 | 0.3412 | 2.9305 |
| RAB1B   | Y | 24 | 0.0013 | 0.0616 | 0.3911 | 2.5569 |
| RBL1    | N | 24 | 0.0002 | 0.3551 | 0.3877 | 2.5792 |
| RUNX1   | N | 24 | 0.0002 | 0.3406 | 0.3822 | 2.6162 |
| RUVBL1  | N | 24 | 0.0003 | 0.2174 | 0.3893 | 2.5689 |
| SQSTM1  | N | 24 | 0.0002 | 0.1196 | 0.3602 | 2.7762 |
| XBP1    | Y | 24 | 0.0004 | 0.0833 | 0.3519 | 2.8417 |
| CCND2   | Y | 23 | 0      | 0.1779 | 0.3537 | 2.8276 |
| CDX2    | Y | 23 | 0.0007 | 0.0316 | 0.3348 | 2.9866 |
| CUL5    | N | 23 | 0.0002 | 0.1344 | 0.3747 | 2.6685 |
| EGR2    | Y | 23 | 0.0009 | 0.0198 | 0.3381 | 2.9581 |
| FHOD1   | Y | 23 | 0.0008 | 0.0632 | 0.3515 | 2.8451 |
| HNRNPA1 | N | 23 | 0.0004 | 0.3162 | 0.4137 | 2.417  |
| KPNB1   | N | 23 | 0.0006 | 0.2925 | 0.4145 | 2.4126 |
| MYOD1   | N | 23 | 0.0001 | 0.249  | 0.3613 | 2.7678 |
| NCOA1   | N | 23 | 0.0002 | 0.2964 | 0.3767 | 2.6543 |
| NKX2-1  | Y | 23 | 0.0006 | 0.1146 | 0.3413 | 2.9299 |
| NOTCH2  | Y | 23 | 0.0001 | 0.0395 | 0.3399 | 2.9417 |
| NRAS    | Y | 23 | 0.0007 | 0.0474 | 0.379  | 2.6382 |
| PIAS1   | N | 23 | 0.0001 | 0.2648 | 0.3701 | 2.7019 |
| SET     | N | 23 | 0.0005 | 0.2767 | 0.4118 | 2.4284 |
| SFN     | N | 23 | 0.0001 | 0.2016 | 0.3641 | 2.7464 |
| SH3KBP1 | N | 23 | 0.0004 | 0.2134 | 0.3779 | 2.6462 |
| SMARCB1 | N | 23 | 0.0004 | 0.253  | 0.3922 | 2.5499 |
| TFAP2C  | Y | 23 | 0.0007 | 0.1739 | 0.3829 | 2.6119 |
| TRIM28  | N | 23 | 0.0002 | 0.3439 | 0.3783 | 2.6436 |
| VAV1    | N | 23 | 0.0002 | 0.2134 | 0.3532 | 2.8314 |
| WASF1   | Y | 23 | 0.0003 | 0.0435 | 0.3413 | 2.9303 |
| XRCC5   | N | 23 | 0.0003 | 0.2253 | 0.3897 | 2.5662 |
| YWHAH   | N | 23 | 0.0002 | 0.1937 | 0.3792 | 2.6372 |
| ZNF148  | Y | 23 | 0.0004 | 0.1897 | 0.3758 | 2.6611 |
| BCL6    | N | 22 | 0.0004 | 0.1558 | 0.3697 | 2.7052 |
| CLTC    | N | 22 | 0.0003 | 0.1602 | 0.3722 | 2.6866 |
| CRKL    | N | 22 | 0.0004 | 0.2165 | 0.3863 | 2.5888 |
| FOXO4   | Y | 22 | 0.0001 | 0.1818 | 0.3603 | 2.7756 |
| HK2     | Y | 22 | 0.0005 | 0.0216 | 0.358  | 2.7932 |
| HLA-B   | N | 22 | 0.0002 | 0.0606 | 0.3628 | 2.7564 |
| HNRNPD  | N | 22 | 0.0003 | 0.2294 | 0.3821 | 2.6174 |
| HNRNPU  | N | 22 | 0.0001 | 0.2121 | 0.3651 | 2.7388 |
| KLF6    | Y | 22 | 0.0003 | 0.0909 | 0.369  | 2.7097 |

|         |   |    |        |        |        |        |
|---------|---|----|--------|--------|--------|--------|
| LASP1   | Y | 22 | 0.0003 | 0.0216 | 0.3453 | 2.896  |
| LCK     | N | 22 | 0.0001 | 0.1645 | 0.3443 | 2.9045 |
| MAP3K10 | Y | 22 | 0.0003 | 0.026  | 0.3315 | 3.0166 |
| MARCKS  | Y | 22 | 0.0001 | 0.0779 | 0.365  | 2.7396 |
| MTAP    | Y | 22 | 0.0006 | 0.0433 | 0.358  | 2.7932 |
| NCOA6   | N | 22 | 0.0002 | 0.2987 | 0.3756 | 2.6621 |
| PHF10   | Y | 22 | 0.0001 | 0.0433 | 0.3406 | 2.9362 |
| POLR2A  | N | 22 | 0.0004 | 0.2121 | 0.4027 | 2.4835 |
| ROCK1   | Y | 22 | 0.0008 | 0.0563 | 0.3638 | 2.7489 |
| TERF1   | N | 22 | 0.0001 | 0.0476 | 0.3464 | 2.8867 |
| TIAM1   | Y | 22 | 0.0001 | 0.0606 | 0.348  | 2.8737 |
| TIMP2   | Y | 22 | 0      | 0.0087 | 0.3253 | 3.0738 |
| TWF1    | Y | 22 | 0.0006 | 0.026  | 0.3605 | 2.7742 |
| XIAP    | N | 22 | 0.0005 | 0.1299 | 0.39   | 2.5643 |
| ZEB2    | Y | 22 | 0.0003 | 0.2381 | 0.3912 | 2.556  |
| API5    | Y | 21 | 0.0009 | 0.019  | 0.3574 | 2.7978 |
| ARHGEF1 | Y | 21 | 0.0003 | 0.0524 | 0.347  | 2.8818 |
| BAG4    | Y | 21 | 0.0004 | 0.1571 | 0.3858 | 2.5921 |
| DDX5    | N | 21 | 0.0002 | 0.281  | 0.3769 | 2.6529 |
| E2F2    | Y | 21 | 0.0002 | 0.0571 | 0.3563 | 2.8068 |
| GTF2I   | N | 21 | 0.0003 | 0.2619 | 0.3868 | 2.5851 |
| HDAC6   | N | 21 | 0.0004 | 0.1571 | 0.3871 | 2.5833 |
| HIST3H3 | N | 21 | 0.0001 | 0.1286 | 0.3427 | 2.9177 |
| HNRNPM  | N | 21 | 0.0001 | 0.2714 | 0.3696 | 2.7054 |
| INSR    | N | 21 | 0.0001 | 0.181  | 0.3473 | 2.8792 |
| ITCH    | N | 21 | 0.0003 | 0.1667 | 0.3748 | 2.6682 |
| NFYA    | N | 21 | 0.0003 | 0.3048 | 0.4015 | 2.4904 |
| NKRF    | Y | 21 | 0.0001 | 0.0952 | 0.3551 | 2.8161 |
| PDK1    | Y | 21 | 0.0001 | 0.1238 | 0.3548 | 2.8182 |
| PPP2R1A | N | 21 | 0.0003 | 0.2476 | 0.3877 | 2.5796 |
| RUVBL2  | N | 21 | 0.0005 | 0.2905 | 0.4091 | 2.4445 |
| SMARCA2 | N | 21 | 0.0001 | 0.2095 | 0.3634 | 2.7518 |
| SMYD3   | Y | 21 | 0.0011 | 0.0905 | 0.3745 | 2.6704 |
| TP53BP1 | N | 21 | 0.0002 | 0.2619 | 0.3683 | 2.7149 |
| ZEB1    | Y | 21 | 0      | 0.1095 | 0.3401 | 2.94   |
| AURKA   | N | 20 | 0.0002 | 0.1895 | 0.3776 | 2.6481 |
| BARD1   | N | 20 | 0.0003 | 0.2842 | 0.3955 | 2.5282 |
| BTG2    | Y | 20 | 0.0005 | 0.0105 | 0.3398 | 2.9425 |
| CDK9    | N | 20 | 0.0002 | 0.2842 | 0.3813 | 2.6228 |
| CFTR    | N | 20 | 0.0002 | 0.0421 | 0.3499 | 2.858  |
| DDX17   | N | 20 | 0.0003 | 0.3895 | 0.4126 | 2.4235 |
| H2AFX   | N | 20 | 0.0002 | 0.3632 | 0.3887 | 2.5728 |
| HRAS    | N | 20 | 0.0001 | 0.0737 | 0.3518 | 2.8429 |
| KAT2A   | N | 20 | 0.0001 | 0.3105 | 0.3725 | 2.6844 |

|         |   |    |        |        |        |        |
|---------|---|----|--------|--------|--------|--------|
| LYN     | N | 20 | 0.0001 | 0.2421 | 0.3741 | 2.6731 |
| MDC1    | N | 20 | 0.0002 | 0.1947 | 0.378  | 2.6458 |
| NR4A1   | N | 20 | 0.0003 | 0.2053 | 0.3573 | 2.7989 |
| PAK4    | Y | 20 | 0.0002 | 0.1158 | 0.3698 | 2.7045 |
| PIK3C2A | Y | 20 | 0.0001 | 0.0579 | 0.343  | 2.9154 |
| RARA    | N | 20 | 0.0001 | 0.1947 | 0.3571 | 2.8    |
| ROCK2   | Y | 20 | 0.0005 | 0.0316 | 0.3596 | 2.7809 |
| RPS27A  | N | 20 | 0.0006 | 0.1947 | 0.4108 | 2.4341 |
| SNW1    | N | 20 | 0.0002 | 0.2842 | 0.3846 | 2.5998 |
| TBP     | N | 20 | 0.0002 | 0.3789 | 0.3876 | 2.58   |
| TOP1    | N | 20 | 0.0003 | 0.3158 | 0.4102 | 2.4378 |
| TOP2A   | N | 20 | 0.0002 | 0.3105 | 0.3766 | 2.6554 |
| TSC2    | N | 20 | 0.0001 | 0.1789 | 0.3574 | 2.798  |
| UBB     | N | 20 | 0.0004 | 0.1632 | 0.393  | 2.5444 |
| ACTG1   | N | 19 | 0.0002 | 0.1462 | 0.3608 | 2.7716 |
| AP3B1   | Y | 19 | 0.0008 | 0.0234 | 0.3591 | 2.7845 |
| APAF1   | Y | 19 | 0.0002 | 0.1637 | 0.3646 | 2.7427 |
| BAX     | N | 19 | 0.0001 | 0.2339 | 0.3494 | 2.8624 |
| CDKN1C  | Y | 19 | 0      | 0.1813 | 0.3443 | 2.9041 |
| COL2A1  | Y | 19 | 0.001  | 0.0409 | 0.3308 | 3.0233 |

---

Supplementary table S2 | Functional annotation for all miRNA targets (p-value < 0.05 and FDR < 0.05)

| <b>Term</b>                                                                                             | <b>Genes</b> | <b>P-value</b> |
|---------------------------------------------------------------------------------------------------------|--------------|----------------|
| <b>Biological process</b>                                                                               |              |                |
| GO:0045449~regulation of transcription                                                                  | 200          | 6.22E-24       |
| GO:0051252~regulation of RNA metabolic process                                                          | 162          | 1.81E-25       |
| GO:0006355~regulation of transcription, DNA-dependent                                                   | 158          | 1.26E-24       |
| GO:0042127~regulation of cell proliferation                                                             | 146          | 3.18E-60       |
| GO:0006350~transcription                                                                                | 143          | 9.32E-12       |
| GO:0043067~regulation of programmed cell death                                                          | 137          | 5.28E-51       |
| GO:0010941~regulation of cell death                                                                     | 137          | 8.32E-51       |
| GO:0042981~regulation of apoptosis                                                                      | 135          | 6.17E-50       |
| GO:0007242~intracellular signaling cascade                                                              | 132          | 9.15E-27       |
| GO:0010604~positive regulation of macromolecule metabolic process                                       | 125          | 2.8E-39        |
| GO:0007166~cell surface receptor linked signal transduction                                             | 124          | 1.37E-09       |
| GO:0006357~regulation of transcription from RNA polymerase II promoter                                  | 110          | 9.99E-36       |
| GO:0006793~phosphorus metabolic process                                                                 | 109          | 5.16E-24       |
| GO:0006796~phosphate metabolic process                                                                  | 109          | 5.16E-24       |
| GO:0031328~positive regulation of cellular biosynthetic process                                         | 107          | 5.85E-36       |
| GO:0009891~positive regulation of biosynthetic process                                                  | 107          | 2.21E-35       |
| GO:0010033~response to organic substance                                                                | 103          | 3.59E-31       |
| GO:0051173~positive regulation of nitrogen compound metabolic process                                   | 102          | 1.03E-34       |
| GO:0010557~positive regulation of macromolecule biosynthetic process                                    | 102          | 3.96E-34       |
| GO:0010628~positive regulation of gene expression                                                       | 97           | 7.4E-35        |
| GO:0045935~positive regulation of nucleobase, nucleoside, nucleotide and nucleic acid metabolic process | 96           | 1.53E-31       |
| GO:0010605~negative regulation of macromolecule metabolic process                                       | 96           | 5.61E-26       |
| GO:0016310~phosphorylation                                                                              | 94           | 4.93E-22       |
| GO:0045941~positive regulation of transcription                                                         | 92           | 3.55E-32       |
| GO:0006468~protein amino acid phosphorylation                                                           | 89           | 1.24E-24       |
| GO:0008284~positive regulation of cell proliferation                                                    | 85           | 2.83E-37       |
| GO:0007049~cell cycle                                                                                   | 85           | 5.6E-18        |
| GO:0051174~regulation of phosphorus metabolic process                                                   | 84           | 3.44E-31       |
| GO:0019220~regulation of phosphate metabolic process                                                    | 84           | 3.44E-31       |
| GO:0042325~regulation of phosphorylation                                                                | 83           | 1.06E-31       |
| GO:0045893~positive regulation of transcription, DNA-dependent                                          | 82           | 3.42E-30       |
| GO:0051254~positive regulation of RNA metabolic process                                                 | 82           | 6.23E-30       |
| GO:0008219~cell death                                                                                   | 82           | 2.2E-18        |
| GO:0016265~death                                                                                        | 82           | 3.34E-18       |
| GO:0009890~negative regulation of biosynthetic process                                                  | 79           | 1.05E-22       |
| GO:0043069~negative regulation of programmed cell death                                                 | 77           | 4.94E-35       |
| GO:0060548~negative regulation of cell death                                                            | 77           | 6.04E-35       |
| GO:0045934~negative regulation of nucleobase, nucleoside, nucleotide and nucleic acid metabolic process | 77           | 1.71E-24       |

|                                                                                 |    |          |
|---------------------------------------------------------------------------------|----|----------|
| GO:0051172~negative regulation of nitrogen compound metabolic process           | 77 | 4.07E-24 |
| GO:0010558~negative regulation of macromolecule biosynthetic process            | 77 | 1.11E-22 |
| GO:0031327~negative regulation of cellular biosynthetic process                 | 77 | 5.3E-22  |
| GO:0012501~programmed cell death                                                | 77 | 9.19E-20 |
| GO:0043066~negative regulation of apoptosis                                     | 76 | 1.35E-34 |
| GO:0006928~cell motion                                                          | 76 | 6.89E-26 |
| GO:0010629~negative regulation of gene expression                               | 76 | 3.04E-24 |
| GO:0044093~positive regulation of molecular function                            | 76 | 3.08E-20 |
| GO:0009719~response to endogenous stimulus                                      | 75 | 1.06E-29 |
| GO:0006915~apoptosis                                                            | 75 | 5.82E-19 |
| GO:0009725~response to hormone stimulus                                         | 72 | 4.03E-30 |
| GO:0016481~negative regulation of transcription                                 | 71 | 2.77E-23 |
| GO:0051338~regulation of transferase activity                                   | 70 | 4.03E-28 |
| GO:0045944~positive regulation of transcription from RNA polymerase II promoter | 69 | 2.12E-27 |
| GO:0043085~positive regulation of catalytic activity                            | 69 | 6.61E-19 |
| GO:0007167~enzyme linked receptor protein signaling pathway                     | 68 | 8.82E-29 |
| GO:0043549~regulation of kinase activity                                        | 68 | 1.25E-27 |
| GO:0009611~response to wounding                                                 | 68 | 7.3E-18  |
| GO:0043065~positive regulation of apoptosis                                     | 67 | 3.85E-22 |
| GO:0043068~positive regulation of programmed cell death                         | 67 | 5.68E-22 |
| GO:0010942~positive regulation of cell death                                    | 67 | 7.34E-22 |
| GO:0051726~regulation of cell cycle                                             | 64 | 2.31E-26 |
| GO:0045859~regulation of protein kinase activity                                | 64 | 2.49E-25 |
| GO:0022402~cell cycle process                                                   | 64 | 4.15E-14 |
| GO:0042592~homeostatic process                                                  | 64 | 7.72E-09 |
| GO:0030182~neuron differentiation                                               | 63 | 5.03E-19 |
| GO:0008285~negative regulation of cell proliferation                            | 61 | 5.62E-22 |
| GO:0008283~cell proliferation                                                   | 61 | 7.7E-18  |
| GO:0045892~negative regulation of transcription, DNA-dependent                  | 59 | 7.81E-21 |
| GO:0051253~negative regulation of RNA metabolic process                         | 59 | 1.8E-20  |
| GO:0051094~positive regulation of developmental process                         | 58 | 1.26E-25 |
| GO:0007243~protein kinase cascade                                               | 58 | 2.65E-19 |
| GO:0032268~regulation of cellular protein metabolic process                     | 58 | 3.03E-14 |
| GO:0001944~vasculature development                                              | 57 | 3.81E-27 |
| GO:0007155~cell adhesion                                                        | 57 | 2.82E-07 |
| GO:0022610~biological adhesion                                                  | 57 | 2.89E-07 |
| GO:0001568~blood vessel development                                             | 56 | 8.13E-27 |
| GO:0040008~regulation of growth                                                 | 55 | 6.92E-19 |
| GO:0032989~cellular component morphogenesis                                     | 54 | 3.36E-15 |
| GO:0051270~regulation of cell motion                                            | 53 | 1.68E-29 |
| GO:0051674~localization of cell                                                 | 53 | 1.55E-19 |
| GO:0048870~cell motility                                                        | 53 | 1.55E-19 |
| GO:0043009~chordate embryonic development                                       | 53 | 4.54E-18 |

|                                                                                 |    |          |
|---------------------------------------------------------------------------------|----|----------|
| GO:0009792~embryonic development ending in birth or egg hatching                | 53 | 6.76E-18 |
| GO:0016477~cell migration                                                       | 52 | 6.77E-21 |
| GO:0010647~positive regulation of cell communication                            | 52 | 1.72E-17 |
| GO:0040012~regulation of locomotion                                             | 51 | 1.21E-27 |
| GO:0000902~cell morphogenesis                                                   | 51 | 2.82E-15 |
| GO:0009628~response to abiotic stimulus                                         | 51 | 1.07E-14 |
| GO:0035295~tube development                                                     | 50 | 8.01E-24 |
| GO:0045597~positive regulation of cell differentiation                          | 50 | 5.24E-23 |
| GO:0001501~skeletal system development                                          | 50 | 1.1E-16  |
| GO:0030334~regulation of cell migration                                         | 49 | 1.96E-28 |
| GO:0007169~transmembrane receptor protein tyrosine kinase signaling pathway     | 49 | 1.38E-22 |
| GO:0030030~cell projection organization                                         | 49 | 1.8E-13  |
| GO:0022403~cell cycle phase                                                     | 49 | 1.4E-11  |
| GO:0009967~positive regulation of signal transduction                           | 48 | 1.11E-16 |
| GO:0048514~blood vessel morphogenesis                                           | 47 | 5.14E-22 |
| GO:0045596~negative regulation of cell differentiation                          | 47 | 1.43E-21 |
| GO:0006917~induction of apoptosis                                               | 47 | 1.6E-14  |
| GO:0012502~induction of programmed cell death                                   | 47 | 1.79E-14 |
| GO:0000122~negative regulation of transcription from RNA polymerase II promoter | 46 | 4.97E-17 |
| GO:0048666~neuron development                                                   | 46 | 5.71E-13 |
| GO:0048878~chemical homeostasis                                                 | 46 | 3.39E-07 |
| GO:0032535~regulation of cellular component size                                | 45 | 6.46E-16 |
| GO:0031399~regulation of protein modification process                           | 45 | 1.58E-14 |
| GO:0048598~embryonic morphogenesis                                              | 45 | 6.82E-14 |
| GO:0048545~response to steroid hormone stimulus                                 | 44 | 3.94E-21 |
| GO:0006916~anti-apoptosis                                                       | 44 | 7.01E-20 |
| GO:0000278~mitotic cell cycle                                                   | 44 | 1.58E-10 |
| GO:0033674~positive regulation of kinase activity                               | 43 | 3.91E-17 |
| GO:0051347~positive regulation of transferase activity                          | 43 | 1.63E-16 |
| GO:0007389~pattern specification process                                        | 43 | 9.82E-15 |
| GO:0048609~reproductive process in a multicellular organism                     | 43 | 1.4E-06  |
| GO:0032504~multicellular organism reproduction                                  | 43 | 1.4E-06  |
| GO:0006461~protein complex assembly                                             | 43 | 3.51E-06 |
| GO:0070271~protein complex biogenesis                                           | 43 | 3.51E-06 |
| GO:0002520~immune system development                                            | 42 | 1.49E-13 |
| GO:0042493~response to drug                                                     | 41 | 1.16E-16 |
| GO:0007610~behavior                                                             | 41 | 3.29E-06 |
| GO:0060284~regulation of cell development                                       | 40 | 1.09E-16 |
| GO:0008361~regulation of cell size                                              | 40 | 1.3E-16  |
| GO:0045860~positive regulation of protein kinase activity                       | 40 | 2.5E-15  |
| GO:0048534~hemopoietic or lymphoid organ development                            | 40 | 4.36E-13 |
| GO:0044092~negative regulation of molecular function                            | 40 | 1.02E-09 |



|                                                                      |    |          |
|----------------------------------------------------------------------|----|----------|
| GO:0051272~positive regulation of cell motion                        | 39 | 2.31E-28 |
| GO:0040017~positive regulation of locomotion                         | 39 | 2.31E-28 |
| GO:0051130~positive regulation of cellular component organization    | 39 | 8.55E-18 |
| GO:0000904~cell morphogenesis involved in differentiation            | 39 | 2.65E-13 |
| GO:0001775~cell activation                                           | 39 | 4.23E-11 |
| GO:0001525~angiogenesis                                              | 38 | 4.5E-20  |
| GO:0051247~positive regulation of protein metabolic process          | 38 | 1.12E-12 |
| GO:0010627~regulation of protein kinase cascade                      | 38 | 2.38E-12 |
| GO:0031175~neuron projection development                             | 38 | 5.58E-12 |
| GO:0030335~positive regulation of cell migration                     | 37 | 1.06E-27 |
| GO:0009991~response to extracellular stimulus                        | 37 | 2.49E-13 |
| GO:0007423~sensory organ development                                 | 37 | 8.6E-13  |
| GO:0030097~hemopoiesis                                               | 37 | 2.16E-12 |
| GO:0006351~transcription, DNA-dependent                              | 37 | 1.04E-09 |
| GO:0032774~RNA biosynthetic process                                  | 37 | 1.51E-09 |
| GO:0007010~cytoskeleton organization                                 | 37 | 2.09E-05 |
| GO:0001932~regulation of protein amino acid phosphorylation          | 36 | 6.91E-16 |
| GO:0042060~wound healing                                             | 36 | 1.63E-14 |
| GO:0032270~positive regulation of cellular protein metabolic process | 36 | 6.93E-12 |
| GO:0045321~leukocyte activation                                      | 36 | 2.08E-11 |
| GO:0010648~negative regulation of cell communication                 | 36 | 4.21E-11 |
| GO:0030155~regulation of cell adhesion                               | 35 | 1.95E-18 |
| GO:0043434~response to peptide hormone stimulus                      | 35 | 9.34E-17 |
| GO:0001558~regulation of cell growth                                 | 35 | 1.52E-13 |
| GO:0003006~reproductive developmental process                        | 35 | 7.91E-10 |
| GO:0051301~cell division                                             | 35 | 1.73E-08 |
| GO:0035239~tube morphogenesis                                        | 34 | 1.37E-18 |
| GO:0051960~regulation of nervous system development                  | 34 | 6.16E-13 |
| GO:0032990~cell part morphogenesis                                   | 34 | 1.68E-09 |
| GO:0007264~small GTPase mediated signal transduction                 | 34 | 1.29E-07 |
| GO:0051329~interphase of mitotic cell cycle                          | 33 | 1.22E-20 |
| GO:0051325~interphase                                                | 33 | 3.24E-20 |
| GO:0048729~tissue morphogenesis                                      | 33 | 5.35E-13 |
| GO:0048812~neuron projection morphogenesis                           | 33 | 5.62E-11 |
| GO:0009968~negative regulation of signal transduction                | 33 | 1.5E-10  |
| GO:0048858~cell projection morphogenesis                             | 33 | 2.14E-09 |
| GO:0048732~gland development                                         | 32 | 7.83E-16 |
| GO:0031667~response to nutrient levels                               | 32 | 3.36E-11 |
| GO:0003002~regionalization                                           | 32 | 3.36E-11 |
| GO:0050767~regulation of neurogenesis                                | 31 | 1.86E-12 |
| GO:0001701~in utero embryonic development                            | 31 | 8.83E-12 |
| GO:0014070~response to organic cyclic substance                      | 30 | 1.98E-15 |
| GO:0032583~regulation of gene-specific transcription                 | 30 | 3.5E-14  |
| GO:0045165~cell fate commitment                                      | 30 | 9.57E-14 |

|                                                                    |    |          |
|--------------------------------------------------------------------|----|----------|
| GO:0070482~response to oxygen levels                               | 30 | 1.41E-13 |
| GO:0000165~MAPKKK cascade                                          | 30 | 1.41E-10 |
| GO:0007507~heart development                                       | 30 | 5.87E-09 |
| GO:0033043~regulation of organelle organization                    | 30 | 7.28E-09 |
| GO:0044057~regulation of system process                            | 30 | 1.26E-05 |
| GO:0046649~lymphocyte activation                                   | 29 | 4.15E-09 |
| GO:0048667~cell morphogenesis involved in neuron differentiation   | 29 | 1.25E-08 |
| GO:0060429~epithelium development                                  | 29 | 7.63E-08 |
| GO:0006366~transcription from RNA polymerase II promoter           | 29 | 1.46E-07 |
| GO:0051240~positive regulation of multicellular organismal process | 29 | 3.52E-07 |
| GO:0043086~negative regulation of catalytic activity               | 29 | 4.45E-06 |
| GO:0051098~regulation of binding                                   | 28 | 4.32E-11 |
| GO:0007409~axonogenesis                                            | 28 | 8.94E-09 |
| GO:0010035~response to inorganic substance                         | 28 | 3.3E-08  |
| GO:0060341~regulation of cellular localization                     | 28 | 1.6E-06  |
| GO:0043627~response to estrogen stimulus                           | 27 | 2.51E-14 |
| GO:0001666~response to hypoxia                                     | 27 | 1.07E-11 |
| GO:0043405~regulation of MAP kinase activity                       | 27 | 3.58E-11 |
| GO:0044087~regulation of cellular component biogenesis             | 27 | 4.22E-11 |
| GO:0032101~regulation of response to external stimulus             | 27 | 5.64E-10 |
| GO:0006979~response to oxidative stress                            | 27 | 1.13E-09 |
| GO:0031401~positive regulation of protein modification process     | 27 | 1.92E-08 |
| GO:0009314~response to radiation                                   | 27 | 7.75E-08 |
| GO:0030029~actin filament-based process                            | 27 | 2.97E-06 |
| GO:0060541~respiratory system development                          | 26 | 4.16E-13 |
| GO:0007568~aging                                                   | 26 | 6.49E-13 |
| GO:0022604~regulation of cell morphogenesis                        | 26 | 3.93E-11 |
| GO:0007398~ectoderm development                                    | 26 | 2.69E-07 |
| GO:0051050~positive regulation of transport                        | 26 | 2.29E-06 |
| GO:0030036~actin cytoskeleton organization                         | 26 | 2.93E-06 |
| GO:0030324~lung development                                        | 25 | 4.16E-13 |
| GO:0030323~respiratory tube development                            | 25 | 8.41E-13 |
| GO:0045926~negative regulation of growth                           | 25 | 4.84E-12 |
| GO:0051129~negative regulation of cellular component organization  | 25 | 1.31E-09 |
| GO:0007346~regulation of mitotic cell cycle                        | 25 | 5.37E-09 |
| GO:0040007~growth                                                  | 25 | 2.08E-07 |
| GO:0010608~posttranscriptional regulation of gene expression       | 25 | 2.83E-06 |
| GO:0048584~positive regulation of response to stimulus             | 25 | 1.94E-05 |
| GO:0046777~protein amino acid autophosphorylation                  | 24 | 1.02E-13 |
| GO:0032868~response to insulin stimulus                            | 24 | 4.22E-12 |
| GO:0002521~leukocyte differentiation                               | 24 | 1.34E-09 |
| GO:0045664~regulation of neuron differentiation                    | 24 | 1.83E-09 |
| GO:0032870~cellular response to hormone stimulus                   | 24 | 1.83E-09 |
| GO:0032880~regulation of protein localization                      | 24 | 3.85E-09 |

|                                                                                 |    |          |
|---------------------------------------------------------------------------------|----|----------|
| GO:0030900~forebrain development                                                | 24 | 2.57E-08 |
| GO:0048568~embryonic organ development                                          | 24 | 2.62E-07 |
| GO:0008544~epidermis development                                                | 24 | 8.84E-07 |
| GO:0007517~muscle organ development                                             | 24 | 9.28E-06 |
| GO:0001763~morphogenesis of a branching structure                               | 23 | 4.11E-14 |
| GO:0034097~response to cytokine stimulus                                        | 23 | 1.84E-13 |
| GO:0051101~regulation of DNA binding                                            | 23 | 1.55E-09 |
| GO:0051051~negative regulation of transport                                     | 23 | 1.29E-08 |
| GO:0007584~response to nutrient                                                 | 23 | 2.56E-08 |
| GO:0009952~anterior/posterior pattern formation                                 | 23 | 2.56E-08 |
| GO:0043062~extracellular structure organization                                 | 23 | 4.05E-07 |
| GO:0000082~G1/S transition of mitotic cell cycle                                | 22 | 7.04E-16 |
| GO:0048754~branching morphogenesis of a tube                                    | 22 | 2.43E-14 |
| GO:0045786~negative regulation of cell cycle                                    | 22 | 3.04E-12 |
| GO:0010551~regulation of specific transcription from RNA polymerase II promoter | 22 | 6.58E-11 |
| GO:0045792~negative regulation of cell size                                     | 22 | 1.86E-10 |
| GO:0043408~regulation of MAPKKK cascade                                         | 22 | 1.22E-09 |
| GO:0060348~bone development                                                     | 22 | 1.18E-08 |
| GO:0031099~regeneration                                                         | 21 | 1.02E-12 |
| GO:0050678~regulation of epithelial cell proliferation                          | 21 | 1.85E-12 |
| GO:0031344~regulation of cell projection organization                           | 21 | 1.68E-10 |
| GO:0001503~ossification                                                         | 21 | 1.9E-08  |
| GO:0051241~negative regulation of multicellular organismal process              | 21 | 6.65E-06 |
| GO:0051345~positive regulation of hydrolase activity                            | 21 | 2.46E-05 |
| GO:0000079~regulation of cyclin-dependent protein kinase activity               | 20 | 7.15E-14 |
| GO:0043193~positive regulation of gene-specific transcription                   | 20 | 8.12E-10 |
| GO:0043523~regulation of neuron apoptosis                                       | 20 | 1.5E-09  |
| GO:0030308~negative regulation of cell growth                                   | 20 | 2.22E-09 |
| GO:0051348~negative regulation of transferase activity                          | 20 | 4.7E-09  |
| GO:0042327~positive regulation of phosphorylation                               | 20 | 5.63E-09 |
| GO:0010562~positive regulation of phosphorus metabolic process                  | 20 | 9.57E-09 |
| GO:0045937~positive regulation of phosphate metabolic process                   | 20 | 9.57E-09 |
| GO:0007050~cell cycle arrest                                                    | 20 | 1.59E-08 |
| GO:0019216~regulation of lipid metabolic process                                | 20 | 6.54E-08 |
| GO:0045137~development of primary sexual characteristics                        | 20 | 5.04E-07 |
| GO:0051493~regulation of cytoskeleton organization                              | 20 | 1.47E-06 |
| GO:0007548~sex differentiation                                                  | 20 | 7.13E-06 |
| GO:0010720~positive regulation of cell development                              | 19 | 9.85E-11 |
| GO:0010769~regulation of cell morphogenesis involved in differentiation         | 19 | 6.98E-10 |
| GO:0009894~regulation of catabolic process                                      | 19 | 2.92E-08 |
| GO:0048585~negative regulation of response to stimulus                          | 19 | 5.65E-08 |
| GO:0021700~developmental maturation                                             | 19 | 6.63E-08 |
| GO:0002009~morphogenesis of an epithelium                                       | 19 | 6.63E-08 |

|                                                                                     |    |          |
|-------------------------------------------------------------------------------------|----|----------|
| GO:0043406~positive regulation of MAP kinase activity                               | 19 | 7.76E-08 |
| GO:0007178~transmembrane receptor protein serine/threonine kinase signaling pathway | 19 | 9.07E-08 |
| GO:0060173~limb development                                                         | 19 | 9.07E-08 |
| GO:0048736~appendage development                                                    | 19 | 9.07E-08 |
| GO:0007265~Ras protein signal transduction                                          | 19 | 1.23E-07 |
| GO:0048705~skeletal system morphogenesis                                            | 19 | 3.38E-07 |
| GO:0070201~regulation of establishment of protein localization                      | 19 | 1.09E-06 |
| GO:0048608~reproductive structure development                                       | 19 | 2E-06    |
| GO:0030879~mammary gland development                                                | 18 | 1.83E-10 |
| GO:0010638~positive regulation of organelle organization                            | 18 | 1.78E-08 |
| GO:0001934~positive regulation of protein amino acid phosphorylation                | 18 | 5.31E-08 |
| GO:0033673~negative regulation of kinase activity                                   | 18 | 6.32E-08 |
| GO:0043583~ear development                                                          | 18 | 1.45E-07 |
| GO:0035107~appendage morphogenesis                                                  | 18 | 2.69E-07 |
| GO:0035108~limb morphogenesis                                                       | 18 | 2.69E-07 |
| GO:0051090~regulation of transcription factor activity                              | 18 | 4.84E-07 |
| GO:0032844~regulation of homeostatic process                                        | 18 | 2.1E-06  |
| GO:0032147~activation of protein kinase activity                                    | 18 | 2.1E-06  |
| GO:0048511~rhythmic process                                                         | 18 | 1.04E-05 |
| GO:0016055~Wnt receptor signaling pathway                                           | 18 | 1.75E-05 |
| GO:0048562~embryonic organ morphogenesis                                            | 18 | 1.75E-05 |
| GO:0009612~response to mechanical stimulus                                          | 17 | 2.47E-10 |
| GO:0032869~cellular response to insulin stimulus                                    | 17 | 5.63E-09 |
| GO:0045637~regulation of myeloid cell differentiation                               | 17 | 8.83E-09 |
| GO:0000302~response to reactive oxygen species                                      | 17 | 2.54E-08 |
| GO:0031960~response to corticosteroid stimulus                                      | 17 | 1.62E-07 |
| GO:0006469~negative regulation of protein kinase activity                           | 17 | 2.27E-07 |
| GO:0030098~lymphocyte differentiation                                               | 17 | 2.41E-06 |
| GO:0030198~extracellular matrix organization                                        | 17 | 2.75E-06 |
| GO:0007411~axon guidance                                                            | 17 | 4.03E-06 |
| GO:0007611~learning or memory                                                       | 17 | 6.55E-06 |
| GO:0008406~gonad development                                                        | 17 | 7.37E-06 |
| GO:0051223~regulation of protein transport                                          | 17 | 9.29E-06 |
| GO:0045765~regulation of angiogenesis                                               | 16 | 1.42E-08 |
| GO:0051216~cartilage development                                                    | 16 | 1.43E-07 |
| GO:0030278~regulation of ossification                                               | 16 | 2.95E-07 |
| GO:0042770~DNA damage response, signal transduction                                 | 16 | 4.17E-07 |
| GO:0035113~embryonic appendage morphogenesis                                        | 16 | 1.28E-06 |
| GO:0030326~embryonic limb morphogenesis                                             | 16 | 1.28E-06 |
| GO:0080135~regulation of cellular response to stress                                | 16 | 1.12E-05 |
| GO:0007565~female pregnancy                                                         | 16 | 2.5E-05  |
| GO:0048660~regulation of smooth muscle cell proliferation                           | 15 | 1.31E-09 |
| GO:0010810~regulation of cell-substrate adhesion                                    | 15 | 1.31E-09 |

|                                                                                          |    |          |
|------------------------------------------------------------------------------------------|----|----------|
| GO:0008629~induction of apoptosis by intracellular signals                               | 15 | 1.33E-08 |
| GO:0045787~positive regulation of cell cycle                                             | 15 | 2.82E-08 |
| GO:0010552~positive regulation of specific transcription from RNA polymerase II promoter | 15 | 2.82E-08 |
| GO:0045785~positive regulation of cell adhesion                                          | 15 | 5.71E-08 |
| GO:0031329~regulation of cellular catabolic process                                      | 15 | 7.15E-08 |
| GO:0033273~response to vitamin                                                           | 15 | 2.05E-07 |
| GO:0010975~regulation of neuron projection development                                   | 15 | 4.43E-07 |
| GO:0032386~regulation of intracellular transport                                         | 15 | 5.32E-07 |
| GO:0040029~regulation of gene expression, epigenetic                                     | 15 | 1.5E-06  |
| GO:0043281~regulation of caspase activity                                                | 15 | 2.06E-06 |
| GO:0045927~positive regulation of growth                                                 | 15 | 2.41E-06 |
| GO:0052548~regulation of endopeptidase activity                                          | 15 | 3.27E-06 |
| GO:0052547~regulation of peptidase activity                                              | 15 | 5.84E-06 |
| GO:0048589~developmental growth                                                          | 15 | 6.72E-06 |
| GO:0000075~cell cycle checkpoint                                                         | 15 | 1.15E-05 |
| GO:0030099~myeloid cell differentiation                                                  | 15 | 1.48E-05 |
| GO:0008637~apoptotic mitochondrial changes                                               | 14 | 4.9E-11  |
| GO:0007162~negative regulation of cell adhesion                                          | 14 | 5.63E-09 |
| GO:0031346~positive regulation of cell projection organization                           | 14 | 1.87E-08 |
| GO:0043392~negative regulation of DNA binding                                            | 14 | 5.49E-08 |
| GO:0046822~regulation of nucleocytoplasmic transport                                     | 14 | 2.83E-07 |
| GO:0050769~positive regulation of neurogenesis                                           | 14 | 3.5E-07  |
| GO:0051100~negative regulation of binding                                                | 14 | 3.5E-07  |
| GO:0007179~transforming growth factor beta receptor signaling pathway                    | 14 | 4.31E-07 |
| GO:0042063~gliogenesis                                                                   | 14 | 1.14E-06 |
| GO:0060562~epithelial tube morphogenesis                                                 | 14 | 1.64E-06 |
| GO:0030522~intracellular receptor-mediated signaling pathway                             | 14 | 6.16E-06 |
| GO:0042113~B cell activation                                                             | 14 | 7.16E-06 |
| GO:0032496~response to lipopolysaccharide                                                | 14 | 8.32E-06 |
| GO:0051384~response to glucocorticoid stimulus                                           | 14 | 9.63E-06 |
| GO:0001952~regulation of cell-matrix adhesion                                            | 13 | 1.2E-10  |
| GO:0048661~positive regulation of smooth muscle cell proliferation                       | 13 | 8.44E-10 |
| GO:0008286~insulin receptor signaling pathway                                            | 13 | 8.93E-09 |
| GO:0042306~regulation of protein import into nucleus                                     | 13 | 7.91E-08 |
| GO:0042326~negative regulation of phosphorylation                                        | 13 | 1.04E-07 |
| GO:0045834~positive regulation of lipid metabolic process                                | 13 | 1.36E-07 |
| GO:0010563~negative regulation of phosphorus metabolic process                           | 13 | 2.26E-07 |
| GO:0032582~negative regulation of gene-specific transcription                            | 13 | 2.26E-07 |
| GO:0045936~negative regulation of phosphate metabolic process                            | 13 | 2.26E-07 |
| GO:0009896~positive regulation of catabolic process                                      | 13 | 2.89E-07 |
| GO:0045444~fat cell differentiation                                                      | 13 | 7.24E-07 |
| GO:0033157~regulation of intracellular protein transport                                 | 13 | 7.24E-07 |
| GO:0032355~response to estradiol stimulus                                                | 13 | 8.98E-07 |

|                                                                                          |    |          |
|------------------------------------------------------------------------------------------|----|----------|
| GO:0042476~odontogenesis                                                                 | 13 | 8.98E-07 |
| GO:0050770~regulation of axonogenesis                                                    | 13 | 1.66E-06 |
| GO:0001890~placenta development                                                          | 13 | 2.96E-06 |
| GO:0009636~response to toxin                                                             | 13 | 3.55E-06 |
| GO:0031668~cellular response to extracellular stimulus                                   | 13 | 6.01E-06 |
| GO:0032103~positive regulation of response to external stimulus                          | 13 | 6.01E-06 |
| GO:0045471~response to ethanol                                                           | 13 | 6.01E-06 |
| GO:0035270~endocrine system development                                                  | 13 | 1.35E-05 |
| GO:0007229~integrin-mediated signaling pathway                                           | 13 | 1.57E-05 |
| GO:0010906~regulation of glucose metabolic process                                       | 12 | 5.44E-08 |
| GO:0010675~regulation of cellular carbohydrate metabolic process                         | 12 | 1.41E-07 |
| GO:0006109~regulation of carbohydrate metabolic process                                  | 12 | 1.9E-07  |
| GO:0050679~positive regulation of epithelial cell proliferation                          | 12 | 3.33E-07 |
| GO:0050795~regulation of behavior                                                        | 12 | 1.18E-06 |
| GO:0030183~B cell differentiation                                                        | 12 | 1.85E-06 |
| GO:0019217~regulation of fatty acid metabolic process                                    | 12 | 2.31E-06 |
| GO:0016202~regulation of striated muscle tissue development                              | 12 | 2.86E-06 |
| GO:0048634~regulation of muscle development                                              | 12 | 3.51E-06 |
| GO:0010565~regulation of cellular ketone metabolic process                               | 12 | 1.1E-05  |
| GO:0034330~cell junction organization                                                    | 12 | 1.1E-05  |
| GO:0001836~release of cytochrome c from mitochondria                                     | 11 | 1.91E-09 |
| GO:0031100~organ regeneration                                                            | 11 | 2.4E-08  |
| GO:0050921~positive regulation of chemotaxis                                             | 11 | 8.15E-08 |
| GO:0050920~regulation of chemotaxis                                                      | 11 | 1.68E-07 |
| GO:0001936~regulation of endothelial cell proliferation                                  | 11 | 2.36E-07 |
| GO:0007569~cell aging                                                                    | 11 | 3.27E-07 |
| GO:0048520~positive regulation of behavior                                               | 11 | 4.47E-07 |
| GO:0031331~positive regulation of cellular catabolic process                             | 11 | 8.07E-07 |
| GO:0010553~negative regulation of specific transcription from RNA polymerase II promoter | 11 | 2.98E-06 |
| GO:0022405~hair cycle process                                                            | 11 | 3.78E-06 |
| GO:0022404~molting cycle process                                                         | 11 | 3.78E-06 |
| GO:0001942~hair follicle development                                                     | 11 | 3.78E-06 |
| GO:0042303~molting cycle                                                                 | 11 | 4.75E-06 |
| GO:0042633~hair cycle                                                                    | 11 | 4.75E-06 |
| GO:0051495~positive regulation of cytoskeleton organization                              | 11 | 7.36E-06 |
| GO:0043433~negative regulation of transcription factor activity                          | 11 | 7.36E-06 |
| GO:0030111~regulation of Wnt receptor signaling pathway                                  | 11 | 9.08E-06 |
| GO:0018108~peptidyl-tyrosine phosphorylation                                             | 11 | 9.08E-06 |
| GO:0010721~negative regulation of cell development                                       | 11 | 1.36E-05 |
| GO:0045793~positive regulation of cell size                                              | 11 | 1.36E-05 |
| GO:0018212~peptidyl-tyrosine modification                                                | 11 | 1.36E-05 |
| GO:0051385~response to mineralocorticoid stimulus                                        | 10 | 2.36E-08 |
| GO:0001569~patterning of blood vessels                                                   | 10 | 3.99E-08 |

|                                                                            |    |          |
|----------------------------------------------------------------------------|----|----------|
| GO:0045639~positive regulation of myeloid cell differentiation             | 10 | 3.43E-06 |
| GO:0046324~regulation of glucose import                                    | 10 | 3.43E-06 |
| GO:0010827~regulation of glucose transport                                 | 10 | 4.5E-06  |
| GO:0051781~positive regulation of cell division                            | 10 | 1.53E-05 |
| GO:0051147~regulation of muscle cell differentiation                       | 10 | 1.53E-05 |
| GO:0051341~regulation of oxidoreductase activity                           | 10 | 1.9E-05  |
| GO:0046626~regulation of insulin receptor signaling pathway                | 9  | 2.76E-07 |
| GO:0010907~positive regulation of glucose metabolic process                | 9  | 2.76E-07 |
| GO:0032570~response to progesterone stimulus                               | 9  | 4.44E-07 |
| GO:0010676~positive regulation of cellular carbohydrate metabolic process  | 9  | 4.44E-07 |
| GO:0045913~positive regulation of carbohydrate metabolic process           | 9  | 4.44E-07 |
| GO:0010594~regulation of endothelial cell migration                        | 9  | 3.2E-06  |
| GO:0048730~epidermis morphogenesis                                         | 9  | 3.2E-06  |
| GO:0000186~activation of MAPKK activity                                    | 9  | 3.2E-06  |
| GO:0019827~stem cell maintenance                                           | 9  | 3.2E-06  |
| GO:0048864~stem cell development                                           | 9  | 4.47E-06 |
| GO:0046320~regulation of fatty acid oxidation                              | 9  | 8.29E-06 |
| GO:0030856~regulation of epithelial cell differentiation                   | 9  | 1.11E-05 |
| GO:0043467~regulation of generation of precursor metabolites and energy    | 9  | 1.46E-05 |
| GO:0048863~stem cell differentiation                                       | 9  | 2.44E-05 |
| GO:0001933~negative regulation of protein amino acid phosphorylation       | 9  | 2.44E-05 |
| GO:0051412~response to corticosterone stimulus                             | 8  | 1.16E-06 |
| GO:0051402~neuron apoptosis                                                | 8  | 4.61E-06 |
| GO:0043255~regulation of carbohydrate biosynthetic process                 | 8  | 9.93E-06 |
| GO:0043542~endothelial cell migration                                      | 8  | 1.41E-05 |
| GO:0014065~phosphoinositide 3-kinase cascade                               | 7  | 2.41E-08 |
| GO:0033627~cell adhesion mediated by integrin                              | 7  | 2.41E-08 |
| GO:0045737~positive regulation of cyclin-dependent protein kinase activity | 7  | 9.31E-08 |
| GO:0010812~negative regulation of cell-substrate adhesion                  | 7  | 1.39E-06 |
| GO:0002687~positive regulation of leukocyte migration                      | 7  | 1.31E-05 |
| GO:0046627~negative regulation of insulin receptor signaling pathway       | 7  | 1.31E-05 |
| GO:0043535~regulation of blood vessel endothelial cell migration           | 7  | 2.03E-05 |
| GO:0046321~positive regulation of fatty acid oxidation                     | 6  | 4.64E-06 |
| GO:0031998~regulation of fatty acid beta-oxidation                         | 6  | 4.64E-06 |
| GO:0033158~regulation of protein import into nucleus, translocation        | 6  | 1.01E-05 |
| GO:0043550~regulation of lipid kinase activity                             | 6  | 1.96E-05 |
| GO:0001953~negative regulation of cell-matrix adhesion                     | 6  | 1.96E-05 |

---

**Molecular function**

|                                             |     |          |
|---------------------------------------------|-----|----------|
| GO:0003677~DNA binding                      | 149 | 6.86E-11 |
| GO:0030528~transcription regulator activity | 145 | 1.57E-26 |
| GO:0000166~nucleotide binding               | 130 | 7.88E-07 |
| GO:0017076~purine nucleotide binding        | 119 | 7.57E-08 |
| GO:0032555~purine ribonucleotide binding    | 116 | 4.45E-08 |
| GO:0032553~ribonucleotide binding           | 116 | 4.45E-08 |

|                                                                              |     |          |
|------------------------------------------------------------------------------|-----|----------|
| GO:0003700~transcription factor activity                                     | 105 | 1.86E-22 |
| GO:0001882~nucleoside binding                                                | 105 | 5.43E-08 |
| GO:0001883~purine nucleoside binding                                         | 104 | 7.36E-08 |
| GO:0030554~adenyl nucleotide binding                                         | 101 | 2.42E-07 |
| GO:0005524~ATP binding                                                       | 98  | 7.36E-08 |
| GO:0032559~adenyl ribonucleotide binding                                     | 98  | 1.4E-07  |
| GO:0043565~sequence-specific DNA binding                                     | 80  | 2.74E-22 |
| GO:0004672~protein kinase activity                                           | 78  | 4.34E-21 |
| GO:0042802~identical protein binding                                         | 70  | 4.64E-15 |
| GO:0019899~enzyme binding                                                    | 68  | 1.33E-18 |
| GO:0008134~transcription factor binding                                      | 67  | 1.98E-18 |
| GO:0046983~protein dimerization activity                                     | 66  | 1.29E-16 |
| GO:0016563~transcription activator activity                                  | 62  | 3.09E-20 |
| GO:0004674~protein serine/threonine kinase activity                          | 47  | 3.13E-10 |
| GO:0016564~transcription repressor activity                                  | 42  | 7.56E-12 |
| GO:0046982~protein heterodimerization activity                               | 36  | 1.36E-13 |
| GO:0003712~transcription cofactor activity                                   | 36  | 5.73E-07 |
| GO:0042803~protein homodimerization activity                                 | 35  | 2.35E-07 |
| GO:0003702~RNA polymerase II transcription factor activity                   | 34  | 3.01E-10 |
| GO:0019900~kinase binding                                                    | 32  | 1.6E-12  |
| GO:0032403~protein complex binding                                           | 31  | 9.17E-11 |
| GO:0004713~protein tyrosine kinase activity                                  | 29  | 3.76E-11 |
| GO:0019901~protein kinase binding                                            | 26  | 3.57E-10 |
| GO:0043566~structure-specific DNA binding                                    | 24  | 7.35E-09 |
| GO:0003690~double-stranded DNA binding                                       | 23  | 1.18E-11 |
| GO:0003682~chromatin binding                                                 | 22  | 2.99E-07 |
| GO:0019838~growth factor binding                                             | 20  | 1.67E-08 |
| GO:0004714~transmembrane receptor protein tyrosine kinase activity           | 19  | 4.31E-11 |
| GO:0010843~promoter binding                                                  | 17  | 2.56E-10 |
| GO:0019207~kinase regulator activity                                         | 16  | 2.48E-06 |
| GO:0046332~SMAD binding                                                      | 13  | 1.12E-07 |
| GO:0005178~integrin binding                                                  | 12  | 1.32E-05 |
| GO:0005518~collagen binding                                                  | 10  | 6.55E-06 |
| GO:0031625~ubiquitin protein ligase binding                                  | 10  | 6.55E-06 |
| GO:0003705~RNA polymerase II transcription factor activity, enhancer binding | 10  | 1.33E-05 |
| GO:0003704~specific RNA polymerase II transcription factor activity          | 10  | 3.08E-05 |
| GO:0016538~cyclin-dependent protein kinase regulator activity                | 7   | 2.76E-05 |
| GO:0016303~1-phosphatidylinositol-3-kinase activity                          | 6   | 3.19E-05 |
| <b>KEGG pathway</b>                                                          |     |          |
| hsa05200:Pathways in cancer                                                  | 110 | 7.49E-56 |
| hsa04510:Focal adhesion                                                      | 59  | 4.54E-25 |
| hsa04010:MAPK signaling pathway                                              | 49  | 6.04E-12 |
| hsa05215:Prostate cancer                                                     | 44  | 2.96E-29 |



|                                                                     |    |          |
|---------------------------------------------------------------------|----|----------|
| hsa05212:Pancreatic cancer                                          | 43 | 4.4E-33  |
| hsa04810:Regulation of actin cytoskeleton                           | 43 | 9E-12    |
| hsa05220:Chronic myeloid leukemia                                   | 42 | 9.78E-31 |
| hsa05210:Colorectal cancer                                          | 42 | 3.84E-28 |
| hsa04062:Chemokine signaling pathway                                | 41 | 1.41E-12 |
| hsa04722:Neurotrophin signaling pathway                             | 40 | 1.82E-18 |
| hsa05222:Small cell lung cancer                                     | 37 | 2.38E-22 |
| hsa05218:Melanoma                                                   | 34 | 6.21E-22 |
| hsa04520:Adherens junction                                          | 34 | 1.47E-20 |
| hsa04110:Cell cycle                                                 | 34 | 2.94E-13 |
| hsa05211:Renal cell carcinoma                                       | 33 | 5.09E-21 |
| hsa04012:ErbB signaling pathway                                     | 33 | 1.37E-17 |
| hsa04310:Wnt signaling pathway                                      | 33 | 3.76E-10 |
| hsa05214:Glioma                                                     | 32 | 1.34E-21 |
| hsa04910:Insulin signaling pathway                                  | 30 | 1.89E-09 |
| hsa05219:Bladder cancer                                             | 29 | 1.2E-24  |
| hsa05223:Non-small cell lung cancer                                 | 29 | 2.1E-20  |
| hsa04660:T cell receptor signaling pathway                          | 28 | 1.88E-10 |
| hsa05213:Endometrial cancer                                         | 27 | 1.68E-18 |
| hsa04666:Fc gamma R-mediated phagocytosis                           | 27 | 4.62E-11 |
| hsa04670:Leukocyte transendothelial migration                       | 27 | 7.73E-09 |
| hsa04360:Axon guidance                                              | 26 | 2.23E-07 |
| hsa04370:VEGF signaling pathway                                     | 25 | 6.64E-12 |
| hsa05221:Acute myeloid leukemia                                     | 24 | 9.76E-14 |
| hsa04350:TGF-beta signaling pathway                                 | 24 | 1.35E-09 |
| hsa04914:Progesterone-mediated oocyte maturation                    | 23 | 6.14E-09 |
| hsa04210:Apoptosis                                                  | 23 | 7.76E-09 |
| hsa04115:p53 signaling pathway                                      | 22 | 3.08E-10 |
| hsa04662:B cell receptor signaling pathway                          | 21 | 1.42E-08 |
| hsa04620:Toll-like receptor signaling pathway                       | 21 | 2.66E-06 |
| hsa04150:mTOR signaling pathway                                     | 20 | 8.14E-11 |
| hsa04664:Fc epsilon RI signaling pathway                            | 19 | 8.19E-07 |
| hsa04916:Melanogenesis                                              | 19 | 2.91E-05 |
| hsa05120:Epithelial cell signaling in Helicobacter pylori infection | 17 | 2.58E-06 |
| hsa04930:Type II diabetes mellitus                                  | 16 | 6.99E-08 |
| hsa04920:Adipocytokine signaling pathway                            | 16 | 1.03E-05 |
| hsa05216:Thyroid cancer                                             | 12 | 5.66E-07 |
| hsa04960:Aldosterone-regulated sodium reabsorption                  | 12 | 2.63E-05 |

---

Supplementary table S3 | Shared annotation terms for target proteins in group1, group2, group3 and their ranks in terms for all targets.

| <b>Term</b>                                                                                             | <b>P-value</b> | <b>Rank</b> |
|---------------------------------------------------------------------------------------------------------|----------------|-------------|
| <b>Biological process</b>                                                                               |                |             |
| GO:0042127~regulation of cell proliferation                                                             | 3.18E-60       | 1           |
| GO:0043067~regulation of programmed cell death                                                          | 5.28E-51       | 2           |
| GO:0010941~regulation of cell death                                                                     | 8.32E-51       | 3           |
| GO:0042981~regulation of apoptosis                                                                      | 6.17E-50       | 4           |
| GO:0010604~positive regulation of macromolecule metabolic process                                       | 2.80E-39       | 5           |
| GO:0008284~positive regulation of cell proliferation                                                    | 2.83E-37       | 6           |
| GO:0031328~positive regulation of cellular biosynthetic process                                         | 5.85E-36       | 7           |
| GO:0006357~regulation of transcription from RNA polymerase II promoter                                  | 9.99E-36       | 8           |
| GO:0009891~positive regulation of biosynthetic process                                                  | 2.21E-35       | 9           |
| GO:0043069~negative regulation of programmed cell death                                                 | 4.94E-35       | 10          |
| GO:0060548~negative regulation of cell death                                                            | 6.04E-35       | 11          |
| GO:0010628~positive regulation of gene expression                                                       | 7.40E-35       | 12          |
| GO:0051173~positive regulation of nitrogen compound metabolic process                                   | 1.03E-34       | 13          |
| GO:0043066~negative regulation of apoptosis                                                             | 1.35E-34       | 14          |
| GO:0010557~positive regulation of macromolecule biosynthetic process                                    | 3.96E-34       | 15          |
| GO:0045941~positive regulation of transcription                                                         | 3.55E-32       | 16          |
| GO:0042325~regulation of phosphorylation                                                                | 1.06E-31       | 17          |
| GO:0045935~positive regulation of nucleobase, nucleoside, nucleotide and nucleic acid metabolic process | 1.53E-31       | 18          |
| GO:0051174~regulation of phosphorus metabolic process                                                   | 3.44E-31       | 19          |
| GO:0019220~regulation of phosphate metabolic process                                                    | 3.44E-31       | 20          |
| GO:0010033~response to organic substance                                                                | 3.59E-31       | 21          |
| GO:0045893~positive regulation of transcription, DNA-dependent                                          | 3.42E-30       | 22          |
| GO:0009725~response to hormone stimulus                                                                 | 4.03E-30       | 23          |
| GO:0051254~positive regulation of RNA metabolic process                                                 | 6.23E-30       | 24          |
| GO:0009719~response to endogenous stimulus                                                              | 1.06E-29       | 25          |
| GO:0051270~regulation of cell motion                                                                    | 1.68E-29       | 26          |
| GO:0030334~regulation of cell migration                                                                 | 1.96E-28       | 28          |
| GO:0051272~positive regulation of cell motion                                                           | 2.31E-28       | 29          |
| GO:0040017~positive regulation of locomotion                                                            | 2.31E-28       | 30          |
| GO:0051338~regulation of transferase activity                                                           | 4.03E-28       | 31          |
| GO:0030335~positive regulation of cell migration                                                        | 1.06E-27       | 32          |
| GO:0040012~regulation of locomotion                                                                     | 1.21E-27       | 33          |
| GO:0043549~regulation of kinase activity                                                                | 1.25E-27       | 34          |
| GO:0045944~positive regulation of transcription from RNA polymerase II promoter                         | 2.12E-27       | 35          |
| GO:0051726~regulation of cell cycle                                                                     | 2.31E-26       | 39          |
| GO:0051252~regulation of RNA metabolic process                                                          | 1.81E-25       | 43          |
| GO:0045859~regulation of protein kinase activity                                                        | 2.49E-25       | 44          |
| GO:0006355~regulation of transcription, DNA-dependent                                                   | 1.26E-24       | 46          |

|                                                       |          |     |
|-------------------------------------------------------|----------|-----|
| GO:0010629~negative regulation of gene expression     | 3.04E-24 | 48  |
| GO:0045449~regulation of transcription                | 6.22E-24 | 52  |
| GO:0035295~tube development                           | 8.01E-24 | 53  |
| GO:0008285~negative regulation of cell proliferation  | 5.62E-22 | 63  |
| GO:0048545~response to steroid hormone stimulus       | 3.94E-21 | 67  |
| GO:0030182~neuron differentiation                     | 5.03E-19 | 80  |
| GO:0043085~positive regulation of catalytic activity  | 6.61E-19 | 82  |
| GO:0035239~tube morphogenesis                         | 1.37E-18 | 84  |
| GO:0007049~cell cycle                                 | 5.60E-18 | 89  |
| GO:0008283~cell proliferation                         | 7.70E-18 | 92  |
| GO:0009628~response to abiotic stimulus               | 1.07E-14 | 113 |
| GO:0031399~regulation of protein modification process | 1.58E-14 | 114 |

---

**Molecular function**

|                                             |          |   |
|---------------------------------------------|----------|---|
| GO:0030528~transcription regulator activity | 1.57E-26 | 1 |
| GO:0003700~transcription factor activity    | 1.86E-22 | 2 |
| GO:0016563~transcription activator activity | 3.09E-20 | 5 |
| GO:0019899~enzyme binding                   | 1.33E-18 | 6 |

---

**KEGG pathway**

|                                   |          |   |
|-----------------------------------|----------|---|
| hsa05200:Pathways in cancer       | 7.49E-56 | 1 |
| hsa05212:Pancreatic cancer        | 4.40E-33 | 2 |
| hsa05220:Chronic myeloid leukemia | 9.78E-31 | 3 |
| hsa05215:Prostate cancer          | 2.96E-29 | 4 |
| hsa05210:Colorectal cancer        | 3.84E-28 | 5 |
| hsa05219:Bladder cancer           | 1.20E-24 | 7 |
| hsa05222:Small cell lung cancer   | 2.38E-22 | 8 |

---
